# Supplementary material
Source: PubMed Central journal article supplement (PMC7052698)
Supplement: 41588_2014_BFng3012_MOESM81_ESM.pdf [file 41588_2014_BFng3012_MOESM81_ESM.pdf]

## Supplementary Figures

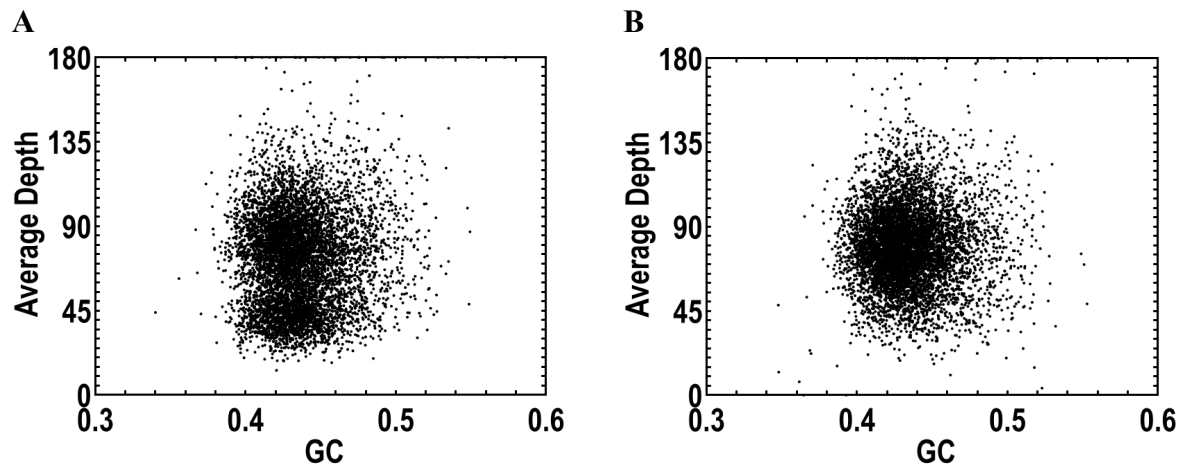

**Supplementary Figure 1 | GC content *versus* sequencing depth of the (A) male and (B) female *Trichuris suis* genome. Calculated as GC% per 10 kb non-overlapping sliding window.**

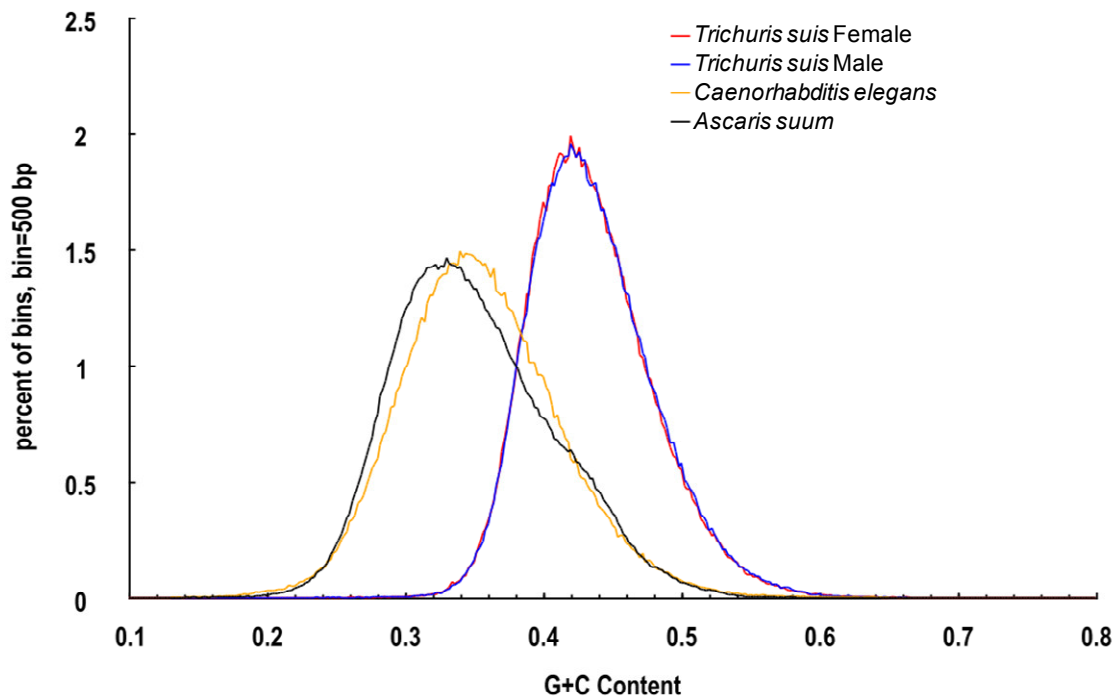

**Supplementary Figure 2 | GC-content distribution for the genomes of *Trichuris suis*, *Caenorhabditis elegans* and *Ascaris suum*.** Data generated using 500 bp sliding windows using a 250 bp overlap. The x-axis is GC content (%), and the y-axis is the proportion of the windows (=bins) corresponding to each GC measurement.

**a**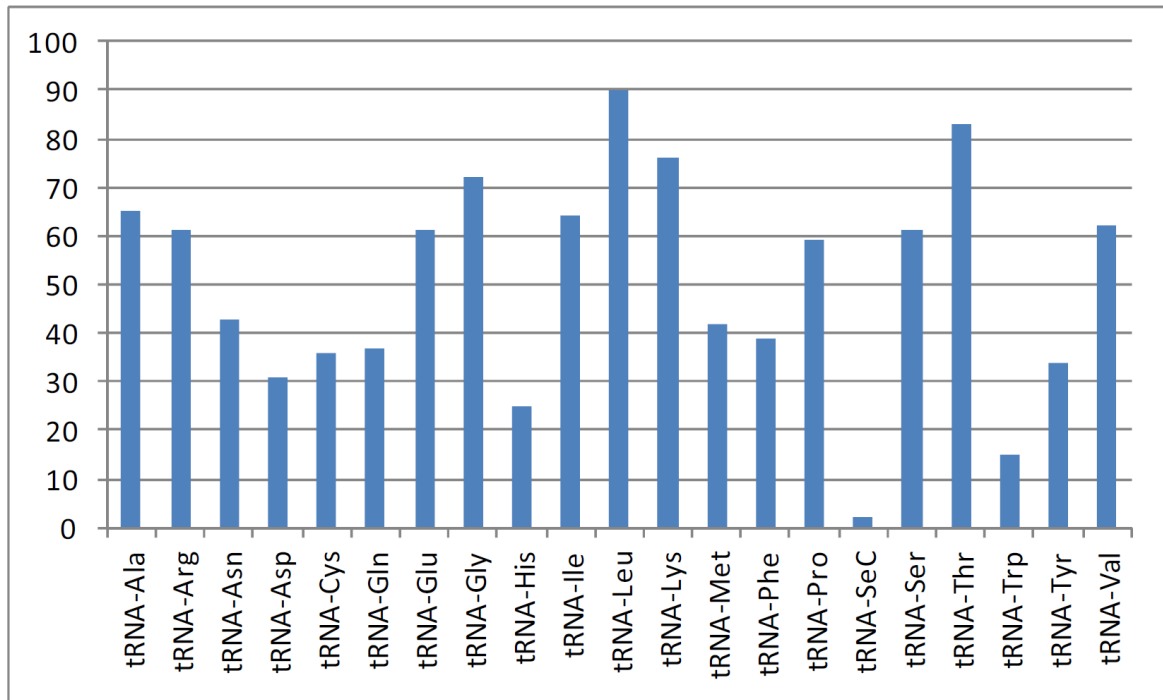**b**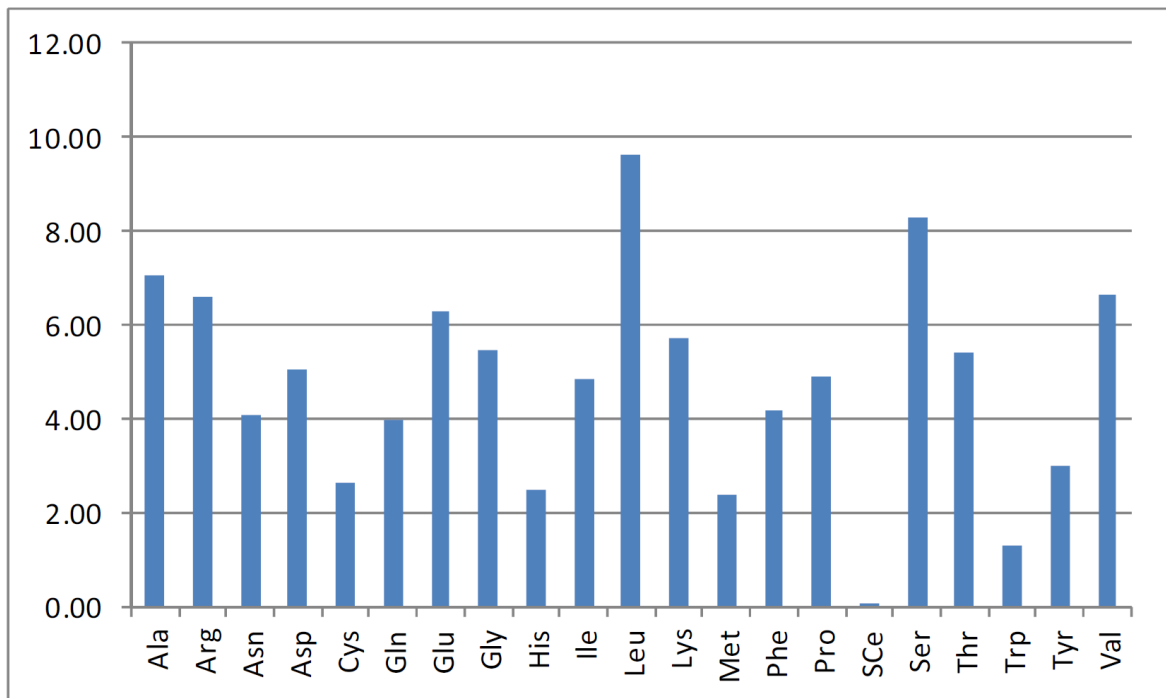

**Supplementary Figure 3 | Frequency histograms comparing the tRNA copy number and the predicted amino acid usage for the *T. suis* genome. (a) tRNA copy number; (b) frequency of amino acids encode by the inferred *T. suis* proteome.**

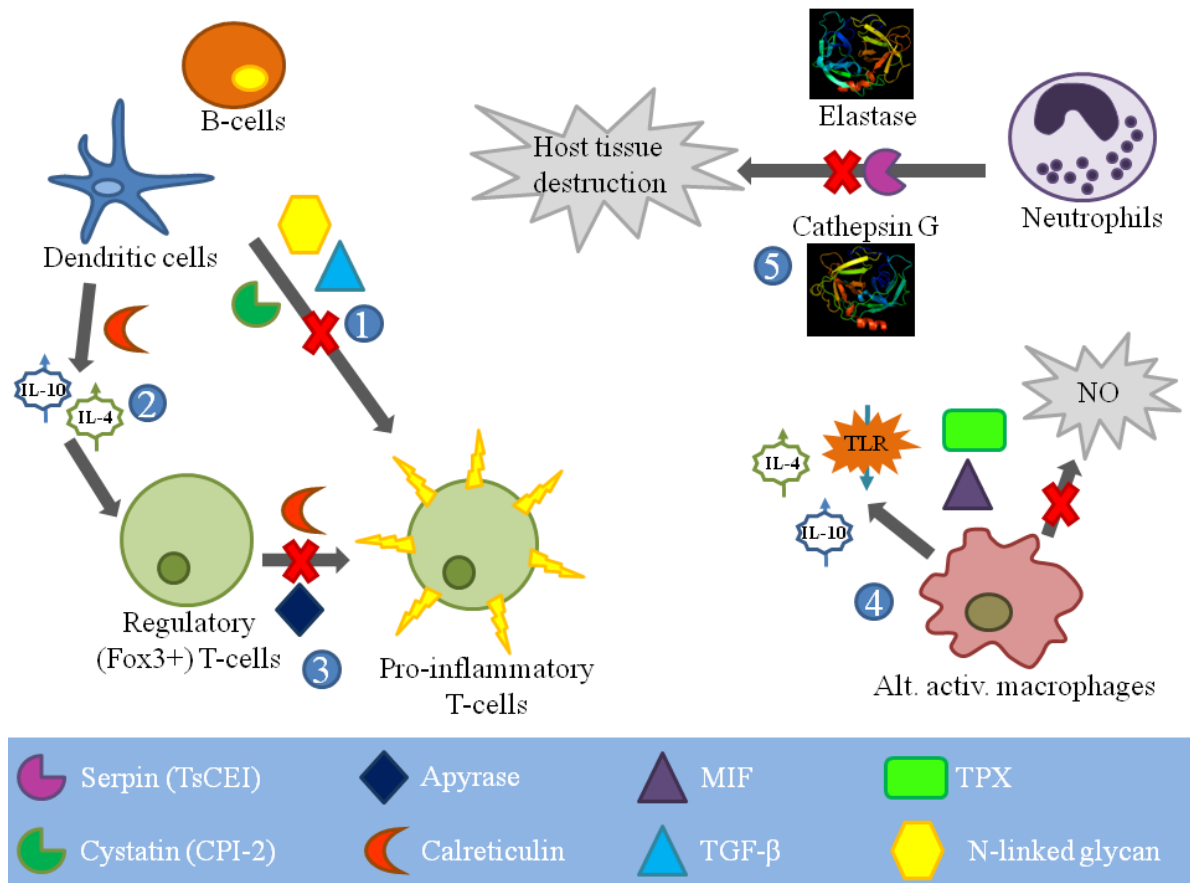

**Supplementary Figure 4 | Proposed mechanisms through which *Trichuris suis* modulates inflammation in its vertebrate host.** Based on enriched transcripts found in larval stages of *T. suis* embedded in the host gut epithelium and up-regulated in the stichosome relative to non-stichosomal tissues in adult males and females. Mechanisms of action (adapted from <sup>1-4</sup>) include secretion of (1) cysteine protease inhibitors, N-glycosylated proteins<sup>2</sup> and a putative TGF- $\beta$  mimic to suppress antigen presentation by host dendritic and B-cells and limit proliferation/stimulation of pro-inflammatory T-cells; (2) calreticulins believed to bind to scavenger receptors on dendritic cells and stimulate production of 'anti-inflammatory' IL-4 and IL-10, leading to proliferation of Fox3+ regulatory T-cells; (3) calreticulins and apyrases that bind free Ca<sup>+</sup> and ATP respectively and prevent conversion of Fox3+ to pro-inflammatory T-cells; (4) thioredoxin peroxidase (TPX) and a putative macrophage initiation factor (MIF) mimic to stimulate alternative activation of host macrophages, inhibiting inflammatory nitrous oxide (NO) production and toll-like receptor (TLR) pathways and stimulating the production of IL-4 and IL-10; and (5) serine protease inhibitors that block neutrophil-secreted cathepsin G and elastases, thereby limiting tissue destruction and reducing inflammation. Red 'X' represents the blocking of a pathway/mechanism due to *Trichuris*-generated immunomodulation.

a

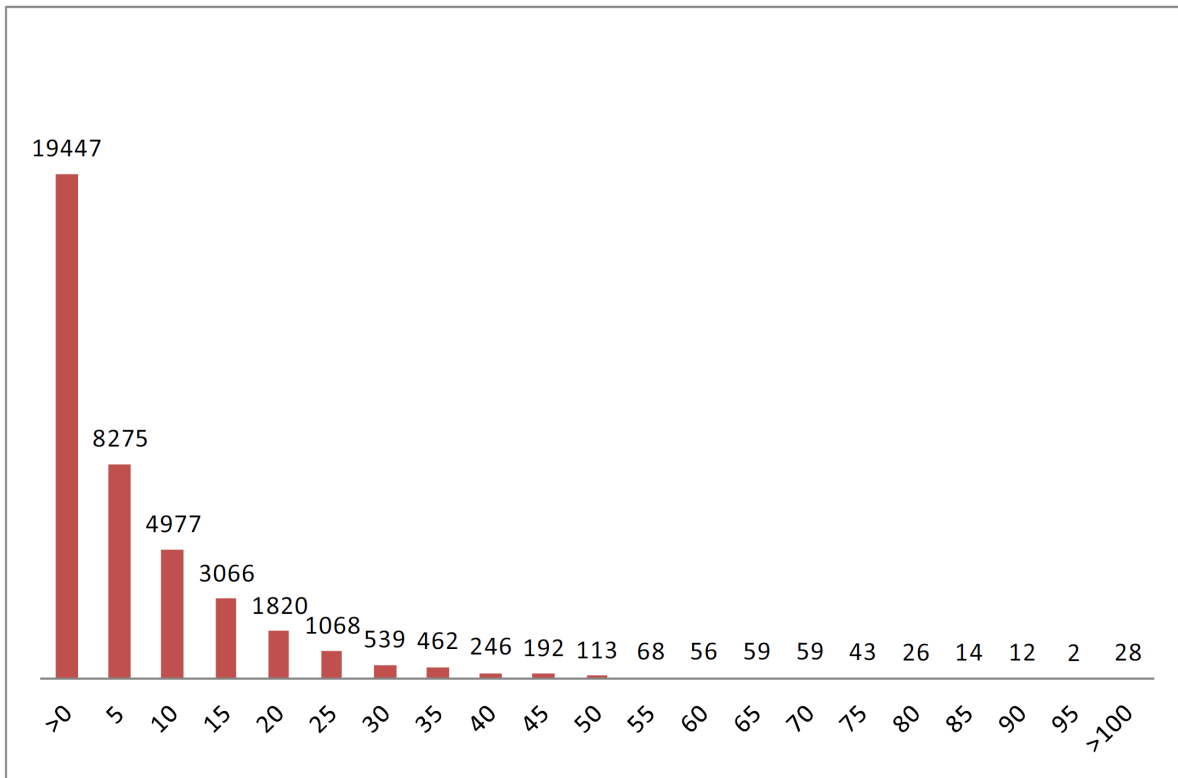

b

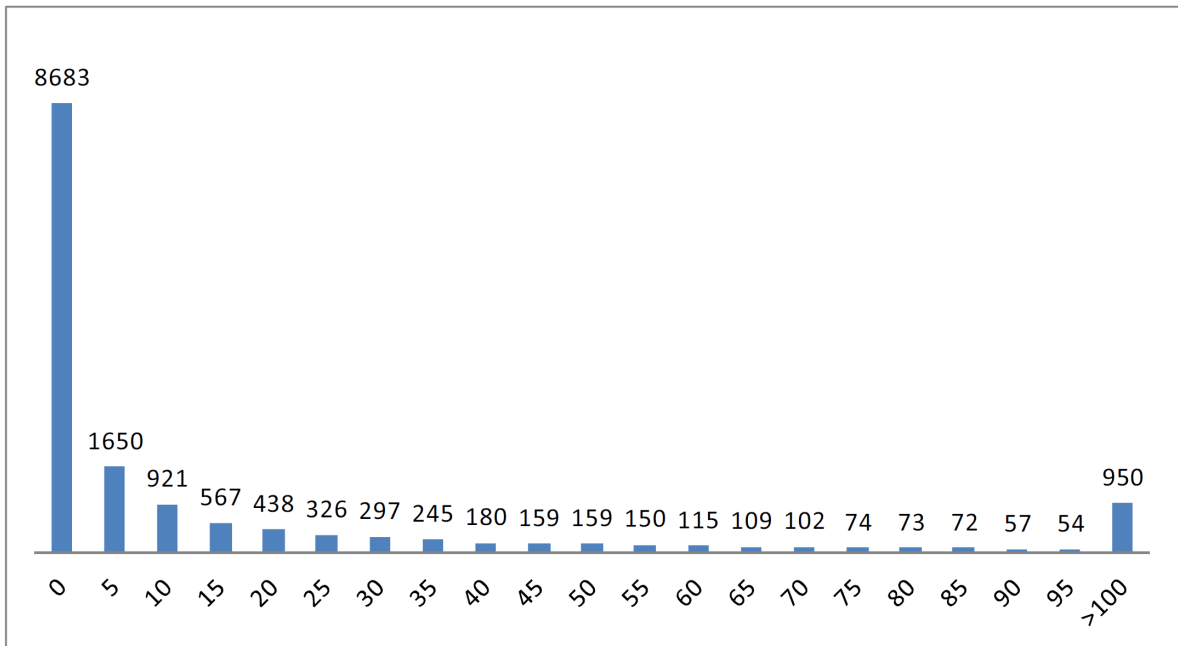

**Supplementary Figure 5 | Frequency histogram summarizing the number of exons per gene and the number of alternatively spliced isoforms the gene encodes. (a) Exons per gene; (b) Transcripts per gene.**

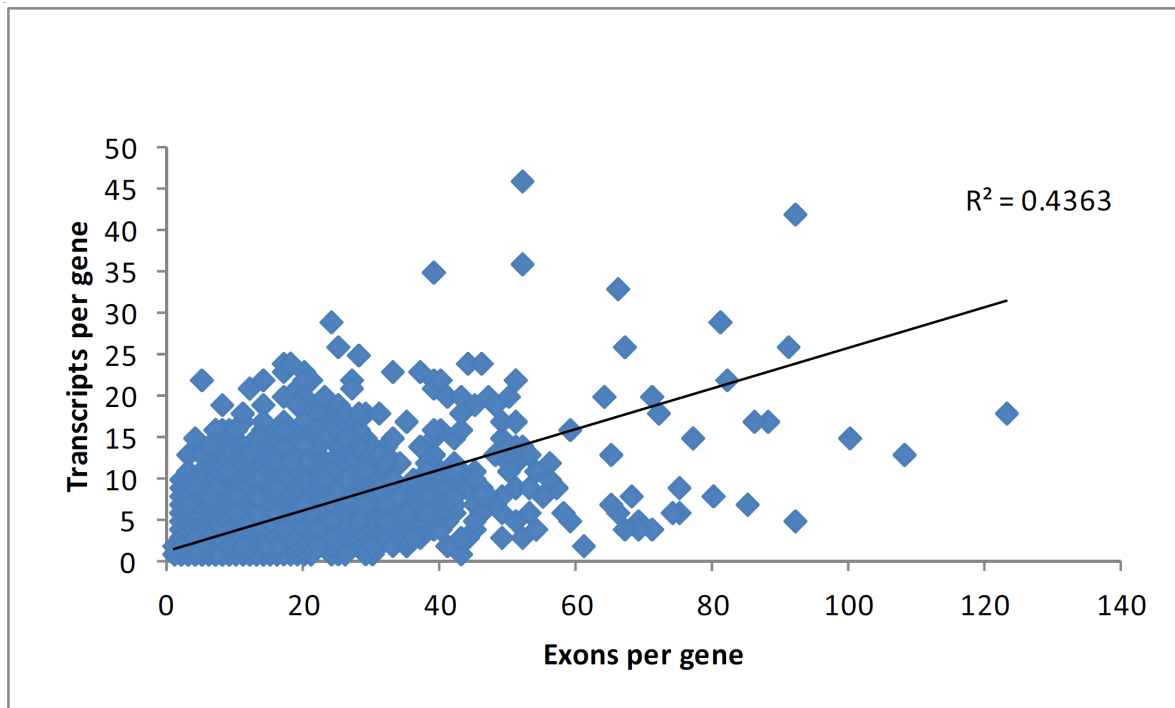

**Supplementary Figure 6 | XY scatterplot comparing transcripts vs exons per gene for the *T. suis* transcriptome.**

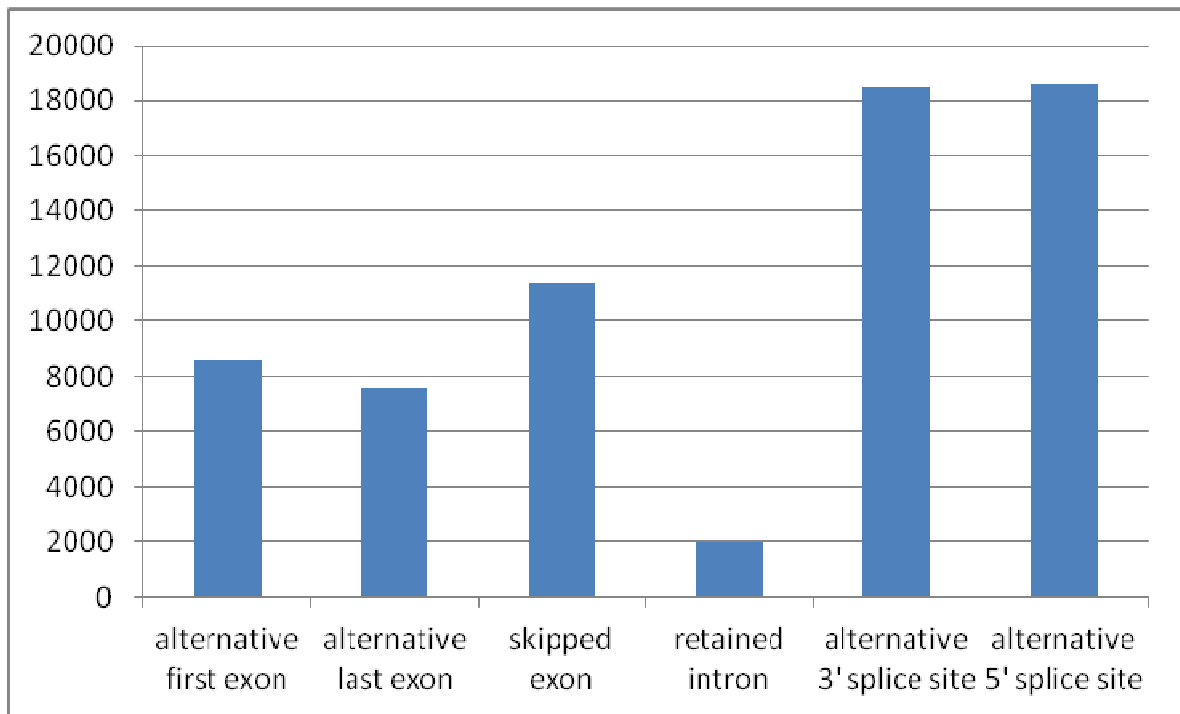

**Supplementary Figure 7 | Frequency histogram of alternative splice events characterized for *Trichuris suis* transcripts.** Splice events predicted for each transcript are available in Supplementary Data 3.

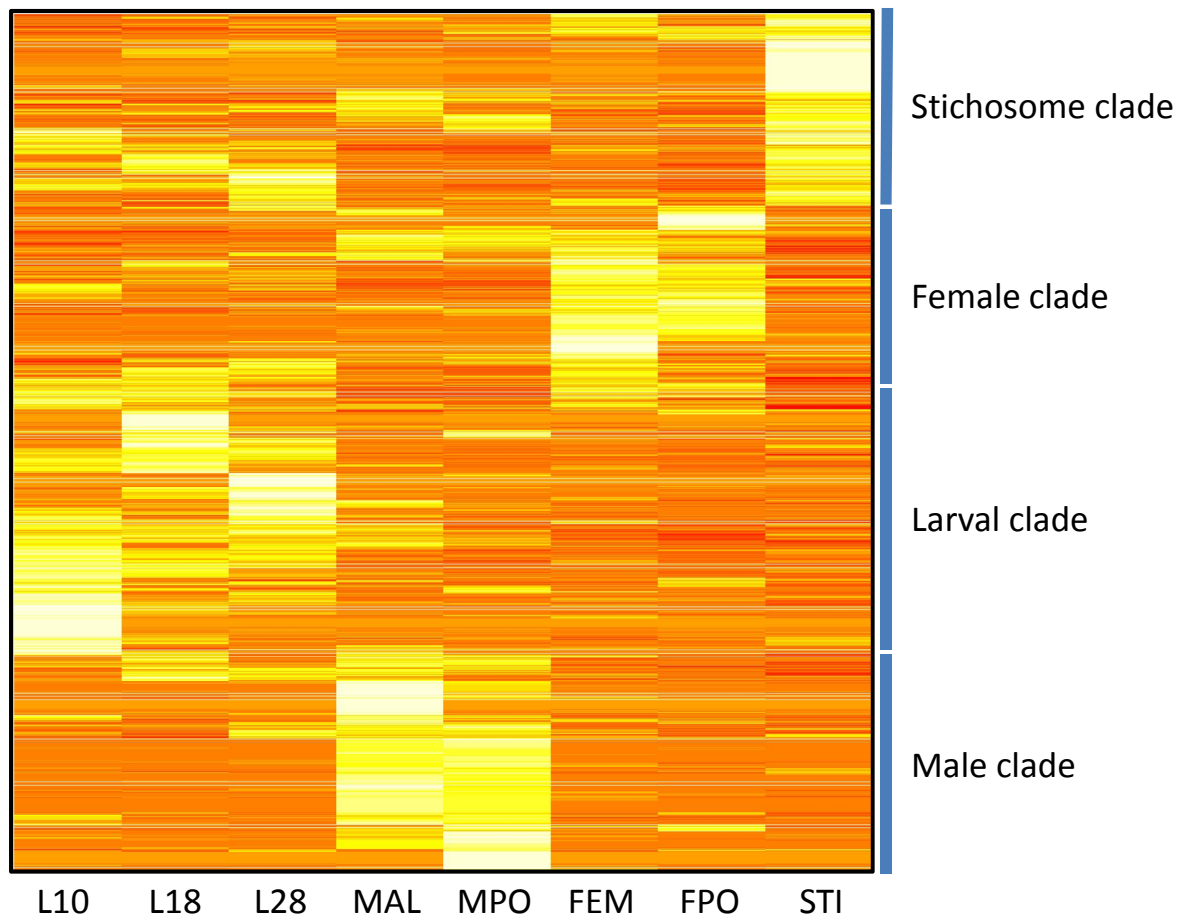

**Supplementary Figure 8 | Normalized heatmap showing stage and tissue-specific transcriptional enrichment profiles of each *T. suis* messenger RNA.** Blue-banding highlight major clusters based on transcriptional profile for stichosome, larval, male and female enriched transcripts. Each row represents one transcript. Highest transcription represented by white coloration. Lowest transcription represented by red coloration. Colour scale used allows comparison between/among libraries for each transcript, but not between/among distinct transcripts. FPKM values for each transcript available in Supplementary Table 18. Dendrogram clustering cropped for presentation.



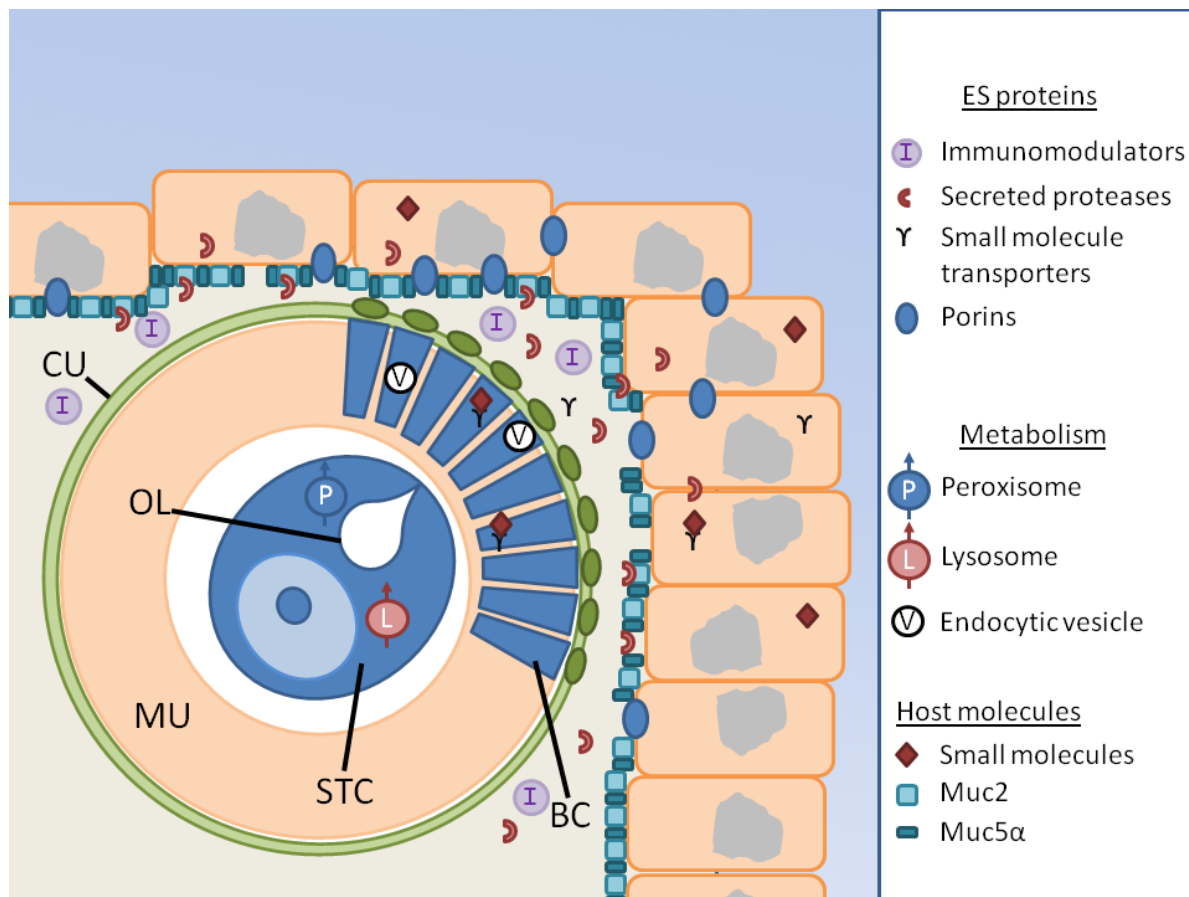

**Supplementary Figure 9 | Schematic representation of molecular mechanisms involved in the interaction between the *Trichuris suis* stichosome (St) and surrounding host tissues (cross section).** All parasite-derived molecules are enriched in the stichosome tissues relative to non-stichosomal tissues in both male and female adult *T. suis*. In this schematic, we propose that secreted proteases, including S1 (chymotrypsin), S9, M12 (astacin) and C1 (cathepsin) families, play an early role in formation of the syncytial tunnel in the host gut epithelium. Among the secreted S1 proteases are several that degrade Muc2 polymers in the host intestinal mucus barrier, exposing the gut epithelial cell membranes. These membranes are then breached by *T. suis* secreted porins, allowing small molecule transporters to enter the host cell cytoplasm and harvest simple sugars, and nucleic and amino acids, which are then taken back into the bacillary cells through endocytosis or another unknown mechanism. In addition, S1 proteases degrade long protein polymers found in the host blood/plasma including fibrinogen (thus inhibiting co-agulation and possibly contributing to the gut haemorrhaging) and kallykrien (possibly providing a means to inhibit inflammation by blocking bradykinin formation). While this is occurring a potent mix of immuno-modulatory proteins (see **Supplementary Fig. 4** and **Supplementary Table 16**) are secreted and specifically regulate/suppress an inflammatory response. We hypothesize also that larger peptide are taken up into the stichocyte by endocytosis and vesicle transport through the bacillary cells and further degraded in the peroxisomes in the stichocytes themselves. Increased lysosome activity in the stichocytes may also suggest degradation of lipids acquired from the host cells, but we cannot propose a source for these molecules based on our current data. Abbreviations: CU = cuticle, MU = muscle, STC = stichocyte, OL = oesophageal lumen, BC = bacillary cell.

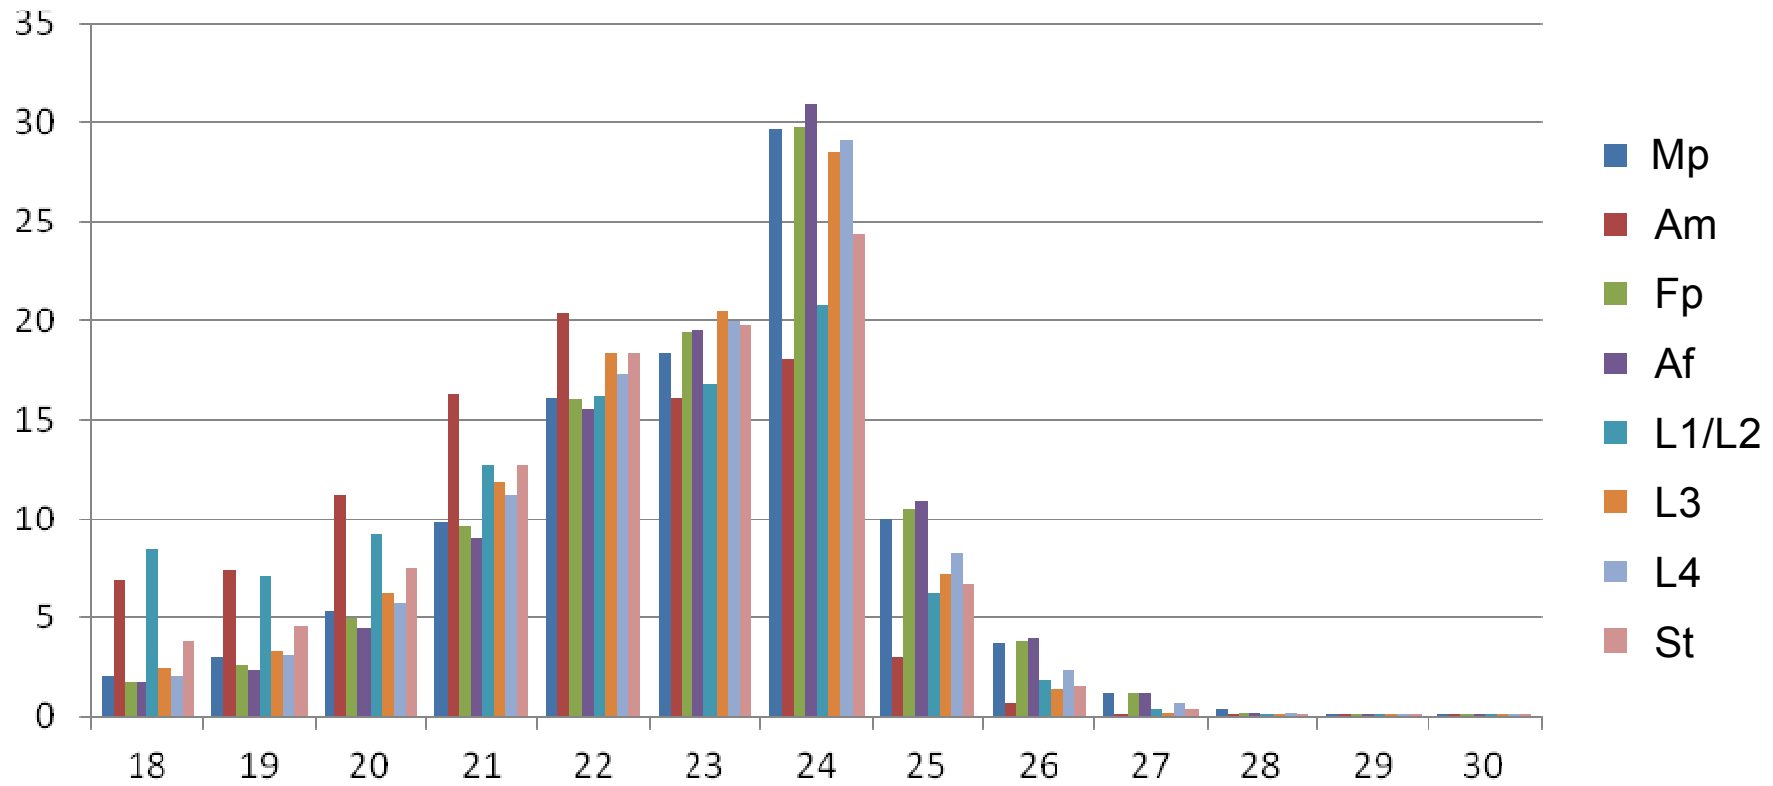

**Supplementary Figure 10 | Frequency histograms showing percentage distribution of small RNA reads by length for *Trichuris suis*.** Mp = male non-stichosomal (i.e., posterior body) tissue; MALE = adult male; F.POST = female non-stichosomal (i.e., posterior body) tissue; FEMALE = adult female; L10 = larvae at 10 days post infection (p.i.); L18 = larvae at 18 days p.i.; L28 = larvae at 28 days p.i.; STICH = adult (mixed sex) stichosomal tissue.

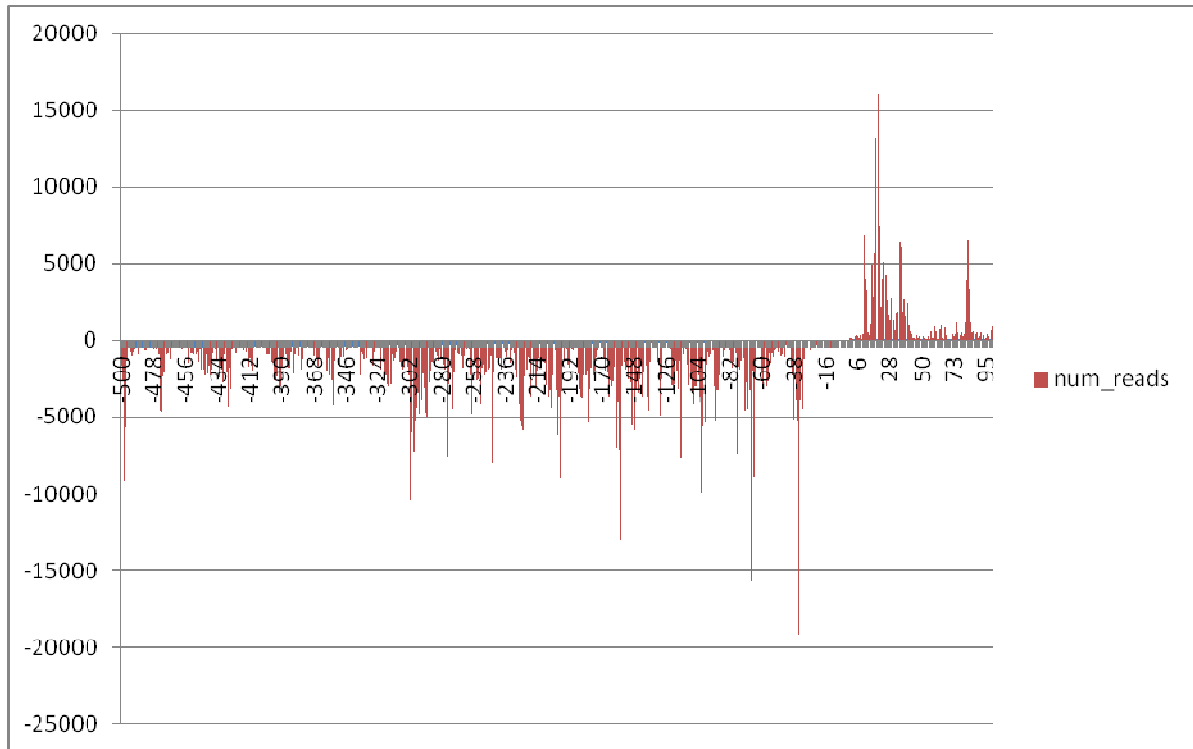

**Supplementary Figure 11 | Frequency distribution of transcription start site associated small RNAs mapping 5' antisense and 3' sense to each transcription start site predicted for the *T. suis* transcriptome.**

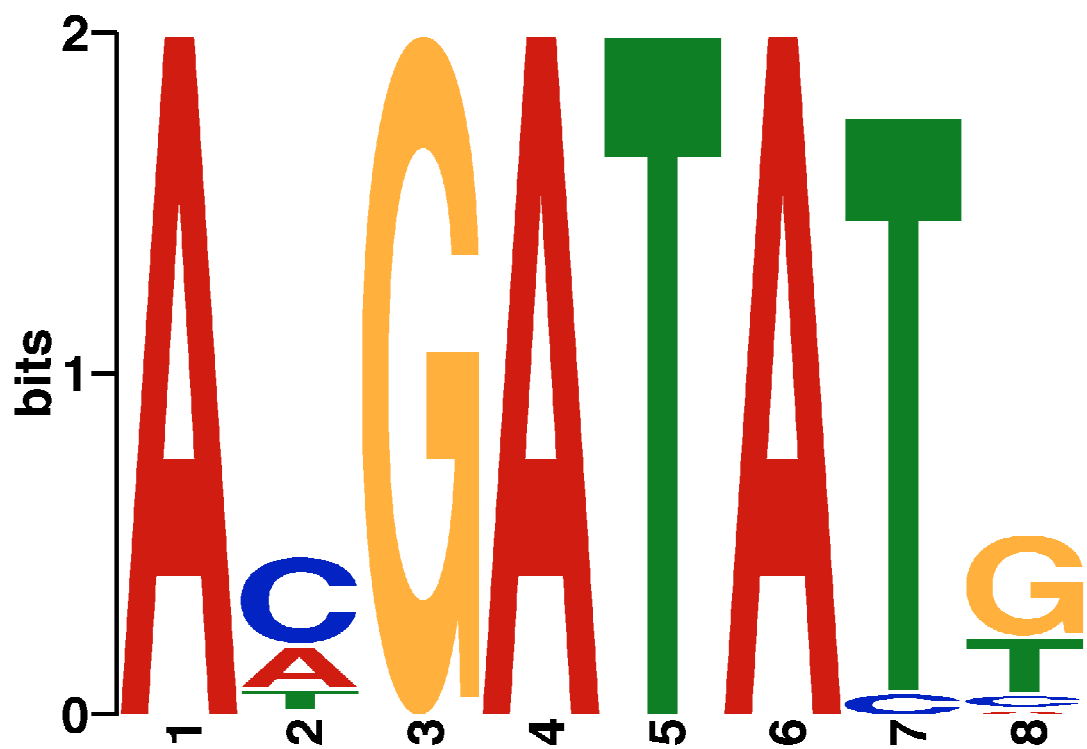

**Supplementary Figure 12 | An 8-nt motif present in 4.5% of 22A-RNAs from *Trichuris suis*.** This represents the one significant motif, among possible motifs ranging in size from 6 to 22 nt, that was shared between 1,174 nonredundant 22A-RNA sequences. The logarithmic probability distribution of individual nucleotides in the motif is shown as a WebLogo (see Methods).

Supplementary Table 1 | General data summary

| Data                        | Number of individuals      | NCBI BioProject | SRA accession | Fragment size | Library type | Read length (bp) | Total raw reads    | Total raw data (bp)   | Total clean reads  | Total clean data (bp) |
|-----------------------------|----------------------------|-----------------|---------------|---------------|--------------|------------------|--------------------|-----------------------|--------------------|-----------------------|
| Female genomic              | 1                          | PRJNA208416     | SRR1041650    | 170           | PE           | 100              | 33,446,068         | 3,344,606,800         | 30,827,784         | 3,021,122,832         |
| Female genomic              | 1                          | PRJNA208416     | SRR1041649    | 500           | PE           | 100              | 20,971,166         | 2,097,116,600         | 18,712,876         | 1,833,861,848         |
| Female genomic              | 1                          | PRJNA208416     | SRR1041648    | 800           | MP           | 100              | 18,996,962         | 1,899,696,200         | 16,771,324         | 1,643,589,752         |
| Female genomic              | 1                          | PRJNA208416     | SRR1041647    | 2000          | MP           | 50               | 68,951,488         | 3,378,622,912         | 57,897,806         | 2,836,992,494         |
| Female genomic              | 1                          | PRJNA208416     | SRR1041646    | 5000          | MP           | 50               | 54,983,752         | 2,694,203,848         | 43,397,704         | 2,126,487,496         |
| Female genomic              | 1                          | PRJNA208416     | SRR1041645    | 10000         | MP           | 50               | 32,556,620         | 1,595,274,380         | 18,414,190         | 902,295,310           |
| <b>Total female genomic</b> |                            |                 |               |               |              |                  | <b>229,906,056</b> | <b>15,009,520,740</b> | <b>186,021,684</b> | <b>12,364,349,732</b> |
| Male genomic                | 1                          | PRJNA208415     | SRR1041644    | 170           | PE           | 100              | 34,816,402         | 3,481,640,200         | 32,525,860         | 3,187,534,280         |
| Male genomic                | 1                          | PRJNA208415     | SRR1041643    | 500           | PE           | 100              | 26,008,128         | 2,600,812,800         | 23,506,604         | 2,068,581,152         |
| Male genomic                | 1                          | PRJNA208415     | SRR1041642    | 800           | MP           | 100              | 11,200,440         | 1,120,044,000         | 9,618,188          | 942,582,424           |
| Male genomic                | 1                          | PRJNA208415     | SRR1041641    | 2000          | MP           | 50               | 78,253,936         | 3,834,442,864         | 63,323,508         | 3,102,851,892         |
| Male genomic                | 1                          | PRJNA208415     | SRR1041640    | 5000          | MP           | 50               | 37,072,032         | 1,816,529,568         | 27,791,474         | 1,361,782,226         |
| Male genomic                | 1                          | PRJNA208415     | SRR1041639    | 10000         | MP           | 50               | 26,316,276         | 1,289,497,524         | 19,410,686         | 951,123,614           |
| <b>Total male genomic</b>   |                            |                 |               |               |              |                  | <b>213,667,214</b> | <b>14,142,966,956</b> | <b>176,176,320</b> | <b>11,614,455,588</b> |
| smallRNA Af                 | 10                         | PRJNA208415     | SRR1041663    | -             | SE           | ~20-40           | 87,716,743         | 2,087,026,528         | 86,974,413         | 2,077,008,801         |
| smallRNA Am                 | 10                         | PRJNA208415     | SRR1041662    | -             | SE           | ~20-40           | 36,335,250         | 824,579,512           | 35,622,760         | 811,386,240           |
| smallRNA Fp                 | 10                         | PRJNA208415     | SRR1041669    | -             | SE           | ~20-40           | 45,524,286         | 1,082,659,626         | 45,124,686         | 1,076,596,732         |
| smallRNA Mp                 | 10                         | PRJNA208415     | SRR1041664    | -             | SE           | ~20-40           | 56,793,761         | 1,358,177,539         | 56,308,373         | 1,351,386,651         |
| smallRNA St                 | 10                         | PRJNA208415     | SRR1041670    | -             | SE           | ~20-40           | 39,407,168         | 901,792,913           | 38,974,944         | 894,308,032           |
| smallRNA L1/L2              | 0,000 (pooled from 5 pigs) | PRJNA208415     | SRR1041659    | -             | SE           | ~20-40           | 52,882,352         | 1,207,202,505         | 50,691,760         | 1,157,224,321         |
| smallRNA L3                 | 5,000 (pooled from 4 pigs) | PRJNA208415     | SRR1041660    | -             | SE           | ~20-40           | 68,361,260         | 1,606,672,788         | 67,699,233         | 1,597,514,753         |
| smallRNA L4                 | 3,000 (pooled from 2 pigs) | PRJNA208415     | SRR1041661    | -             | SE           | ~20-40           | 54,304,680         | 1,276,710,244         | 53,806,103         | 1,269,943,680         |
| <b>Total small RNA</b>      |                            |                 |               |               |              |                  | <b>441,325,500</b> | <b>10,344,821,655</b> | <b>435,202,272</b> | <b>10,235,369,210</b> |
| messengerRNA Female         | 10                         | PRJNA208415     | SRR1041655    | 200           | PE           | 100              | 42,591,650         | 3,833,248,500         | 37,942,368         | 3,414,813,120         |
| messengerRNA Male           | 10                         | PRJNA208415     | SRR1041654    | 200           | PE           | 100              | 41,931,490         | 3,773,834,100         | 38,417,134         | 3,457,542,060         |
| messengerRNA Fp             | 10                         | PRJNA208415     | SRR1041657    | 200           | PE           | 100              | 43,646,026         | 3,928,142,340         | 41,248,854         | 3,712,396,860         |
| messengerRNA Mp             | 10                         | PRJNA208415     | SRR1041656    | 200           | PE           | 100              | 42,386,370         | 3,813,153,300         | 39,460,564         | 3,551,450,760         |
| messengerRNA St             | 10                         | PRJNA208415     | SRR1041658    | 200           | PE           | 100              | 44,345,506         | 3,991,095,540         | 39,287,692         | 3,535,892,280         |
| messengerRNA L1/L2          | 0,000 (pooled from 5 pigs) | PRJNA208415     | SRR1041651    | 200           | PE           | 100              | 42,853,824         | 3,856,844,160         | 40,355,004         | 3,631,950,360         |
| messengerRNA L3             | 5,000 (pooled from 4 pigs) | PRJNA208415     | SRR1041652    | 200           | PE           | 100              | 44,113,156         | 3,970,184,040         | 41,207,030         | 3,708,632,700         |
| messengerRNA L4             | 3,000 (pooled from 2 pigs) | PRJNA208415     | SRR1041653    | 200           | PE           | 100              | 45,374,224         | 4,083,680,160         | 41,298,098         | 3,716,828,820         |
| <b>Total messenger RNA</b>  |                            |                 |               |               |              |                  | <b>347,242,246</b> | <b>31,250,182,140</b> | <b>319,216,744</b> | <b>28,729,506,960</b> |

Genomic reads for each sex all sequenced from the same individual worm

Small and messenger RNA libraries for each stage, sex and tissue sequenced from the same original pool of individual worms

All adults used for whole and tissue specific small and messenger RNA library construction isolated from the same experimentally infected pig

**Supplementary Table 2 | Genome assembly metrics.**

|                               | <b>Male assembly</b>         |               |                            |               | <b>Female Assembly</b>       |               |                            |               |
|-------------------------------|------------------------------|---------------|----------------------------|---------------|------------------------------|---------------|----------------------------|---------------|
|                               | <b>Scaffold<br/>Size(bp)</b> | <b>Number</b> | <b>Contig<br/>Size(bp)</b> | <b>Number</b> | <b>Scaffold<br/>Size(bp)</b> | <b>Number</b> | <b>Contig<br/>Size(bp)</b> | <b>Number</b> |
| N90                           | 819                          | 1,011         | 481                        | 3,510         | 20,572                       | 250           | 4,081                      | 1,535         |
| N80                           | 95,829                       | 165           | 13,187                     | 1,071         | 146,581                      | 143           | 20,461                     | 798           |
| N70                           | 188,455                      | 107           | 28,194                     | 669           | 232,222                      | 103           | 38,602                     | 535           |
| N60                           | 307,826                      | 73            | 44,892                     | 449           | 282,838                      | 74            | 55,778                     | 376           |
| N50                           | 452,488                      | 51            | 65,844                     | 304           | 424,593                      | 51            | 76,312                     | 262           |
| Longest                       | 1,594,463                    | -             | 468,935                    | -             | 1,448,326                    | -             | 577,627                    | -             |
| Total Size                    | 81,300,690                   | -             | 78,876,884                 | -             | 76,029,588                   | -             | 74,207,564                 | -             |
| Total Number ( $\geq 100$ bp) | 81,300,690                   | 60,856        | 78,876,884                 | 63,057        | 76,029,588                   | 42,663        | 74,207,095                 | 44,412        |
| Total Number ( $\geq 2$ kb)   | 72,700,674                   | 628           | 69,712,838                 | 2,199         | 69,887,603                   | 506           | 67,694,526                 | 1,849         |

**Supplementary Table 3 | Core Eukaryotic Genes Mapping Approach (CEGMA) data.**

| Match    | Value              | <i>T. suis</i> male genome | <i>T. suis</i> female genome | <i>C. elegans</i> WS240 genome | <i>C. briggsae</i> WS240 genome | <i>T. suis</i> male gene predictions | <i>T. suis</i> female gene predictions |
|----------|--------------------|----------------------------|------------------------------|--------------------------------|---------------------------------|--------------------------------------|----------------------------------------|
| Complete | Unique proteins    | 231                        | 231                          | 244                            | 246                             | 214                                  | 215                                    |
| Complete | %Completeness      | 93.15                      | 93.15                        | 98.39                          | 99.19                           | 86.29                                | 86.69                                  |
| Complete | Total proteins     | 273                        | 258                          | 271                            | 274                             | 411                                  | 398                                    |
| Complete | Protein redundancy | 1.18                       | 1.12                         | 1.11                           | 1.11                            | 1.92                                 | 1.85                                   |
| Complete | %Ortho             | 14.72                      | 9.96                         | 10.25                          | 11.38                           | 60.75                                | 55.81                                  |
| Partial  | Unique proteins    | 238                        | 238                          | 248                            | 247                             | 236                                  | 238                                    |
| Partial  | %Completeness      | 95.97                      | 95.97                        | 100                            | 99.6                            | 95.16                                | 95.97                                  |
| Partial  | Total proteins     | 298                        | 286                          | 298                            | 295                             | 469                                  | 461                                    |
| Partial  | Protein redundancy | 1.25                       | 1.2                          | 1.2                            | 1.19                            | 1.99                                 | 1.94                                   |
| Partial  | %Ortho             | 21.85                      | 16.81                        | 17.74                          | 18.62                           | 62.71                                | 58.82                                  |

**Supplementary Table 4 | Repeat Content.**

|                                         |              | <b>Male</b>       |             |             | <b>Female</b>     |             |             |
|-----------------------------------------|--------------|-------------------|-------------|-------------|-------------------|-------------|-------------|
| Total Repeat content (bp; % of genome): |              | 23,498,734; 31.65 |             |             | 22,926,863; 32.26 |             |             |
| Number of scaffolds                     |              | 4,293             |             |             | 3,288             |             |             |
| Total assembly length (bp) excluding Ns |              | 71,811,605        |             |             | 69,238,595        |             |             |
| GC content (%)                          |              | 43.57             |             |             | 43.48             |             |             |
| Class                                   | Elements     | Number            | Length (bp) | % of genome | Number            | Length (bp) | % of genome |
| SINEs:                                  |              | 2,166             | 400,850     | 0.54        | 2,229             | 516,257     | 0.73        |
|                                         | ALUs         | 6                 | 88          | 0           | 49                | 14,613      | 0.02        |
|                                         | MIRs         | 26                | 1,815       | 0           | 32                | 2,276       | 0           |
| LINEs:                                  |              | 5,190             | 1,745,994   | 2.35        | 6,632             | 1,812,986   | 2.55        |
|                                         | LINE1        | 147               | 7,690       | 0.01        | 194               | 27,732      | 0.04        |
|                                         | LINE2        | 62                | 3,624       | 0           | 70                | 3,737       | 0.01        |
|                                         | L3/CR1       | 59                | 3,134       | 0           | 61                | 3,399       | 0           |
| LTR                                     | elements:    | 5,304             | 2,498,133   | 3.37        | 4,671             | 2,028,152   | 2.85        |
|                                         | ERV1         | 15                | 865         | 0           | 16                | 804         | 0           |
|                                         | ERV1-MaLRs   | 0                 | 0           | 0           | 0                 | 0           | 0           |
|                                         | ERV_classI   | 364               | 100,858     | 0.14        | 102               | 5,364       | 0.01        |
|                                         | ERV_classII  | 64                | 3,407       | 0           | 75                | 3,872       | 0.01        |
| DNA                                     | elements:    | 22,177            | 6,900,281   | 9.3         | 17,523            | 5,721,863   | 8.05        |
|                                         | hAT-Charlie  | 2,221             | 865,108     | 1.17        | 1,515             | 727,849     | 1.02        |
|                                         | TcMar-Tigger | 8,218             | 2,564,104   | 3.45        | 6,854             | 2,087,420   | 2.94        |
| Unclassified:                           |              | 35,968            | 7,377,876   | 9.94        | 32,468            | 6,595,924   | 9.28        |
| Total interspersed reads                |              |                   | 18,923,134  | 25.49       |                   | 16,675,182  | 23.47       |
| tRNAs                                   |              | 991               | 72,188      | 0.11        | 1,021             | 76,442      | 0.11        |
| Small RNA                               |              | 737               | 84,792      | 0.11        | 788               | 83,004      | 0.12        |
| Satellites:                             |              | 98                | 40,678      | 0.05        | 104               | 10,707      | 0.02        |
| Simple repeats:                         |              | 2,991             | 248,417     | 0.33        | 2,504             | 185,093     | 0.26        |
| Low complexity:                         |              | 1,793             | 88,471      | 0.12        | 1,789             | 92,693      | 0.13        |



**Supplementary Table 7 | Coding gene annotation summary.**

|                                                    | <b>Total</b>  | <b>% of total gene set</b> |
|----------------------------------------------------|---------------|----------------------------|
| Total number coding genes                          | 14,820        | -                          |
| Supported by transcriptomic evidence               | 12,979        | 87.6                       |
| Genes with IPR domains (mean per annotated gene)   | 7,938 (9.2)   | 53.6                       |
| Genes with TM domains (mean per annotated protein) | 2,583 (4.0)   | 17.4                       |
| Genes with SP domains                              | 1,568         | 10.6                       |
| Genes with GO classification                       | 6,147         | 41.5                       |
| Cellular Component                                 | 2,100         | 14.2                       |
| Molecular Function                                 | 5,696         | 38.4                       |
| Biological Process                                 | 3,825         | 25.8                       |
| Hits UniProt/SwissProt                             | 8,123         | 54.8                       |
| Hits KEGG (unique terms)                           | 4,037 (2,664) | 27.2                       |
| <i>A. suum</i> homologues                          | 6,286         | 42.4                       |
| <i>B. malayi</i> homologues                        | 6,340         | 42.7                       |
| <i>C. elegans</i> homologues                       | 6,149         | 41.5                       |
| <i>T. spirallis</i> homologues                     | 8,480         | 57.2                       |
| MEROPs hits                                        | 1,671         | 11.3                       |
| ks-sarfari hits                                    | 232           | 1.6                        |
| IUPHAR:gpcr-sarfari hits                           | 228           | 1.5                        |
| TCDB hits                                          | 1,962         | 13.2                       |
| SPD hits                                           | 4,956         | 33.4                       |
| <b>Key functional classes</b>                      |               |                            |
| Proteases                                          | 623           | 4.2                        |
| Protease Inhibitors                                | 287           | 1.9                        |
| Kinases                                            | 231           | 1.6                        |
| Phosphatases                                       | 262           | 1.8                        |
| GPCRs                                              | 225           | 1.5                        |
| Transporters and Channels                          | 1,928         | 13.0                       |
| 1. Channels/Pores                                  | 529           | 3.6                        |
| 2. Electrochemical Potential-driven transporters   | 305           | 2.1                        |
| 3. Primary Active Transporters                     | 513           | 3.5                        |
| 4. Group Translocators                             | 14            | 0.1                        |
| 5. Transport Electron Carriers                     | 14            | 0.1                        |
| 8. Accessory Factors Involved in Transport         | 128           | 0.9                        |
| 9. Incompletely characterized transport systems    | 425           | 2.9                        |

**Supplementary Table 19| Small RNA summary.**

| <b>small RNA category</b>                              | <b>Total</b>               | <b>L1/L2</b>           | <b>L3</b>               | <b>L4</b>              |
|--------------------------------------------------------|----------------------------|------------------------|-------------------------|------------------------|
| Total sRNA reads sequenced                             | 435,202,272                | 50,691,760             | 67,699,233              | 53,806,103             |
| Mean total read size (range)                           | 23.5 (18-44)               | 22.8 (18-44)           | 23.6 (18-44)            | 23.6 (18-44)           |
| Unique sRNA reads                                      | 58,038,955                 | 7,651,785              | 8,267,136               | 7,246,902              |
| Mean unique read size (range)                          | 23.6 (18-44)               | 23 (18-44)             | 23.6 (18-44)            | 23.8 (18-44)           |
| Redundancy (total/unique sRNA reads)                   | 7.5                        | 6.6                    | 8.2                     | 7.4                    |
| Total sRNA reads aligning to genome                    | 400,033,829                | 38,114,747             | 63,235,915              | 50,864,941             |
| % aligning to genome                                   | 92                         | 75                     | 93                      | 95                     |
| <b>Clusters</b>                                        |                            |                        |                         |                        |
| Total small RNA clusters (n: mean reads per cluster)   | 23,013                     | 16,781                 | 16,781                  | 16,545                 |
| Mean cluster size (range)                              | 484.2                      | 629.3                  | 629.3                   | 635.5                  |
| Protein-coding clusters                                | 11,749                     | 7,827                  | 7,827                   | 7,581                  |
| Noncoding clusters                                     | 11,264                     | 8,954                  | 8,954                   | 8,964                  |
| Consensus reads (min cov n ≥ 20)                       | 2,004,317                  | 245,861                | 450,730                 | 341,437                |
| Coding reads                                           | 1,028,808                  | 129,619                | 247,847                 | 187,744                |
| Exonic                                                 | 900,133                    | 112,756                | 218,898                 | 166,607                |
| sense strand bias (≥ 80%)                              | 176,853                    | 12,681                 | 26,130                  | 19,190                 |
| anti-sense strand bias (≥ 80%)                         | 673,355 (91,640,543: 22.9) | 99,058                 | 188,773                 | 144,491                |
| Coding genes inhibited (n)                             | 3,497                      | 1,993                  | 2,299                   | 2,141                  |
| Map to first exon                                      | 434,124                    | 62,284                 | 120,657                 | 93,540                 |
| Map to second exon                                     | 120,632                    | 19,827                 | 35,103                  | 26,248                 |
| Map to third exon                                      | 58,640                     | 8,776                  | 17,256                  | 12,988                 |
| Map to another exon                                    | 59,959                     | 8,171                  | 15,757                  | 11,715                 |
| 22G-RNAs (total reads)                                 | 21,491 (2,574,054)         | 3,487 (247,853)        | 6,173 (445,054)         | 4,401 (285,472)        |
| 26G-RNAs (total reads)                                 | 9,269 (734,887)            | 516 (29,796)           | 1,147 (59,819)          | 1,157 (53,466)         |
| Most abundant (total reads)                            | 25G (11,056,328)           | 25G (667,580)          | 25G (1,836,068)         | 25G (1,443,468)        |
| Intronic                                               | 128,675                    | 16,863                 | 28,949                  | 21,137                 |
| sense strand bias (≥ 80%)                              | 45,919                     | 5,629                  | 9,658                   | 6,989                  |
| anti-sense strand bias (≥ 80%)                         | 75,535                     | 10,986                 | 18,684                  | 13,748                 |
| Exonic and Intronic                                    | 0                          | 0                      | 0                       | 0                      |
| Non-coding reads                                       | 939,360                    | 116,242                | 202,883                 | 153,693                |
| miRNAs (total miRNA reads: % all sRNA reads)           | 307 (63,140,093: 15.8)     | 276 (2,319,929: 4.6)   | 282 (5,878,451: 8.6)    | 278 (9,225,232: 17.1)  |
| mean mature miRNA size (range)                         | 22.9 (18-25)               | 22.9 (18-25)           | 22.9 (18-25)            | 22.9 (18-25)           |
| mean star miRNA size (range)                           | 22.7 (18-28)               | 22.7 (18-28)           | 22.7 (18-28)            | 22.7 (18-28)           |
| mean precursor miRNA size (range)                      | 66 (44-106)                | 65.9 (47-106)          | 65.5 (46-106)           | 65.8 (47-106)          |
| Antisense to TE (unique sequences)                     | 187,811                    | 23,445                 | 47,882                  | 37,047                 |
| unique 21U-RNA (total reads)                           | 2,102 (190,455)            | 257 (17,006)           | 1,237 (80,581)          | 833 (49,618)           |
| unique 24U-RNA (total reads)                           | 10,123 (1,217,781)         | 1,278 (72,695)         | 4,801 (469,887)         | 3,862 (321,648)        |
| 22nt, 5'A small-RNAs (total reads: % all mapped reads) | 58,307 (36,954,546: 9.2)   | 7,760 (1,307,173: 3.4) | 13,103 (2,966,295: 4.7) | 8,846 (4,467,479: 8.8) |
| Coding (total reads: % all mapped reads)               | 29,883 (3,067,868: 0.8)    | 3,987 (312,764: 0.8)   | 7,043 (471,863: 0.7)    | 4,683 (276,753: 0.5)   |
| Noncoding (total reads: % all mapped reads)            | 28,424 (33,886,678: 8.5)   | 3,773 (994,409: 2.6)   | 6,060 (2,494,432: 4.0)  | 4,163 (4,190,726: 8.2) |
| Annotated space (total reads: % all mapped reads)      | 8,438 (1,166,419: 0.3)     | 1,350 (181,170: 0.5)   | 1,960 (184,205: 0.3)    | 1,362 (98,260: 0.2)    |
| Unannotated space (total reads: % all mapped reads)    | 19,986 (32,720,259: 8.2)   | 2,423 (813,239: 2.1)   | 4,100 (2,310,227: 3.7)  | 2,801 (4,092,466: 8.0) |
| Strand-biased (total reads: % all mapped reads)        | 17,736 (32,602,599: 8.2)   | 2,398 (812,067: 2.1)   | 4,028 (2,307,422: 3.6)  | 2,766 (4,091,267: 8.0) |
| "Sense"-bias (total reads: % all mapped reads)         | 10,864 (1,856,699: 0.5)    | 1,308 (138,678: 0.4)   | 2,400 (245,702: 0.4)    | 1,642 (162,142: 0.3)   |
| "Antisense"-bias (total reads: % all mapped reads)     | 6,872 (30,745,900: 7.7)    | 1,090 (673,389: 1.8)   | 1,628 (2,061,720: 3.3)  | 1,123 (3,929,122: 7.7) |

**Supplementary Table 19| Small RNA summary (cont'd).**

| <b>small RNA category</b>                                     | <b>Am</b>               | <b>Af</b>              | <b>Mp</b>              | <b>Fp</b>              | <b>St</b>               |
|---------------------------------------------------------------|-------------------------|------------------------|------------------------|------------------------|-------------------------|
| Total sRNA reads sequenced                                    | 35,622,760              | 86,974,413             | 56,308,373             | 45,124,686             | 38,974,944              |
| Mean total read size (range)                                  | 22.8 (18-44)            | 23.9 (18-44)           | 24.0 (18-44)           | 23.9 (18-44)           | 22.9 (18-44)            |
| Unique sRNA reads                                             | 5,146,745               | 10,425,332             | 8,047,656              | 6,788,911              | 4,464,488               |
| Mean unique read size (range)                                 | 22.7 (18-44)            | 24.1 (18-44)           | 23.9 (18-44)           | 24 (18-44)             | 23.4 (18-44)            |
| Redundancy (total/unique sRNA reads)                          | 6.9                     | 8.3                    | 7.0                    | 6.6                    | 8.7                     |
| Total sRNA reads aligning to genome                           | 34,069,157              | 80,932,479             | 53,896,484             | 42,296,461             | 36,623,645              |
| % aligning to genome                                          | 96                      | 93                     | 96                     | 94                     | 94                      |
| <b>Clusters</b>                                               |                         |                        |                        |                        |                         |
| Total small RNA clusters (n: mean reads per cluster)          | 16,597                  | 17,794                 | 17,010                 | 16,798                 | 15,672                  |
| Mean cluster size (range)                                     | 633.6                   | 598.3                  | 621.6                  | 628.4                  | 665.1                   |
| Protein-coding clusters                                       | 7,639                   | 8,305                  | 7,787                  | 7,691                  | 7,108                   |
| Noncoding clusters                                            | 8,958                   | 9,480                  | 9,223                  | 9,107                  | 8,564                   |
| <b>Consensus reads (min cov n ≥ 20)</b>                       |                         |                        |                        |                        |                         |
| Coding reads                                                  | 66,264                  | 277,976                | 128,425                | 138,659                | 79,568                  |
| Exonic                                                        | 52,354                  | 243,155                | 105,222                | 120,750                | 79,568                  |
| sense strand bias (≥ 80%)                                     | 11,463                  | 45,236                 | 16,085                 | 21,837                 | 17,612                  |
| anti-sense strand bias (≥ 80%)                                | 40,011                  | 190,846                | 86,804                 | 96,461                 | 53,956                  |
| Coding genes inhibited (n)                                    | 1,749                   | 2,749                  | 2,214                  | 2,272                  | 1,530                   |
| Map to first exon                                             | 27,428                  | 124,344                | 59,695                 | 62,678                 | 35,039                  |
| Map to second exon                                            | 6,615                   | 33,553                 | 14,033                 | 17,451                 | 10,131                  |
| Map to third exon                                             | 2,953                   | 16,732                 | 6,466                  | 8,232                  | 4,768                   |
| Map to another exon                                           | 3,015                   | 16,217                 | 6,610                  | 8,100                  | 4,018                   |
| 22G-RNAs (total reads)                                        | 1,887 (116,533)         | 4,462 (291,106)        | 1,851 (107,811)        | 2,462 (148,476)        | 2,257 (136,771)         |
| 26G-RNAs (total reads)                                        | 98 (5,832)              | 2,766 (152,308)        | 1,002 (53,826)         | 1,164 (58,437)         | 270 (12,009)            |
| Most abundant (total reads)                                   | 25U (254,080)           | 25G (2,419,425)        | 25G (1,008,204)        | 25G (1,010,613)        | 25G (394,102)           |
| Intronic                                                      | 13,910                  | 34,821                 | 23,203                 | 17,909                 | 11,360                  |
| sense strand bias (≥ 80%)                                     | 6,344                   | 11,995                 | 10,286                 | 5,878                  | 4,502                   |
| anti-sense strand bias (≥ 80%)                                | 7,061                   | 21,823                 | 12,078                 | 11,675                 | 6,637                   |
| Exonic and Intronic                                           | 0                       | 0                      | 0                      | 0                      | 0                       |
| <b>Non-coding reads</b>                                       |                         |                        |                        |                        |                         |
| miRNAs (total miRNA reads: % all sRNA reads)                  | 270 (7,215,803: 20.2)   | 284 (12,285,795: 14.1) | 263 (4,540,483: 8.1)   | 274 (6,315,467: 14.0)  | 281 (15,358,933: 39.4)  |
| mean mature miRNA size (range)                                | 22.9 (18-25)            | 23.0 (18-25)           | 23.0 (18-25)           | 22.9 (18-25)           | 22.9 (18-25)            |
| mean star miRNA size (range)                                  | 22.7 (18-28)            | 22.8 (18-28)           | 22.7 (18-28)           | 22.7 (18-28)           | 22.7 (18-28)            |
| mean precursor miRNA size (range)                             | 65.7 (47-106)           | 66.0 (47-106)          | 66.0 (47-106)          | 65.9 (47-106)          | 65.8 (44-106)           |
| Antisense to TE (unique sequences)                            | 11,683                  | 53,885                 | 24,571                 | 27,766                 | 15,922                  |
| unique 21U-RNA (total reads)                                  | 250 (19,836)            | 246 (13,900)           | 169 (10,155)           | 475 (35,285)           | 143 (7,274)             |
| unique 24U-RNA (total reads)                                  | 536 (34,064)            | 2,922 (211,322)        | 1,256 (76,263)         | 3,205 (231,939)        | 856 (48,930)            |
| <b>22nt, 5'A small-RNAs (total reads: % all mapped reads)</b> |                         |                        |                        |                        |                         |
| Coding (total reads: % all mapped reads)                      | 8,099 (4,482,799: 13.1) | 9,784 (7,037,538: 8.7) | 6,514 (2,671,525: 5.0) | 5,055 (3,819,964: 9.0) | 4,797 (8,138,025: 22.2) |
| Coding (total reads: % all mapped reads)                      | 2,826 (185,843: 0.5)    | 4,896 (302,971: 0.4)   | 2,311 (147,746: 0.3)   | 2,511 (148,010: 0.3)   | 2,327 (133,111: 0.3)    |
| Noncoding (total reads: % all mapped reads)                   | 5,273 (4,296,956: 12.6) | 4,888 (6,734,567: 8.3) | 4,203 (2,523,779: 4.7) | 2,544 (3,671,954: 8.7) | 2,470 (8,004,914: 21.9) |
| Annotated space (total reads: % all mapped reads)             | 984 (91,418: 0.3)       | 1,589 (119,132: 0.1)   | 811 (68,309: 0.1)      | 843 (60,622: 0.1)      | 819 (58,523: 0.2)       |
| Unannotated space (total reads: % all mapped reads)           | 4,289 (4,205,538: 12.3) | 3,299 (6,615,435: 8.2) | 3,392 (2,455,470: 4.6) | 1,701 (3,611,332: 8.5) | 1,651 (7,946,391: 21.7) |
| Strand-biased (total reads: % all mapped reads)               | 4,118 (4,199,318: 12.3) | 3,226 (6,612,505: 8.2) | 3,276 (2,451,440: 4.5) | 1,683 (3,610,713: 8.5) | 1,625 (7,945,217: 21.7) |
| "Sense"-bias (total reads: % all mapped reads)                | 2,629 (279,584: 0.8)    | 1,949 (230,736: 0.3)   | 2,066 (194,073: 0.3)   | 999 (124,664: 0.3)     | 958 (126,048: 0.3)      |
| "Antisense"-bias (total reads: % all mapped reads)            | 1,489 (3,919,734: 11.5) | 1,277 (6,381,769: 7.9) | 1,210 (2,257,367: 4.2) | 684 (3,486,049: 8.2)   | 667 (7,819,169: 21.4)   |

**Supplementary Table 20| Frequency distribution of consensus and total small RNAs of *Trichuis suis*.**

| <b>Read length</b> | <b>Consensus G</b> | <b>Total G</b> | <b>Consensus A</b> | <b>Total A</b> | <b>Consensus U</b> | <b>Total U</b> | <b>Consensus C</b> | <b>Total C</b> |
|--------------------|--------------------|----------------|--------------------|----------------|--------------------|----------------|--------------------|----------------|
| 18                 | 2048               | 261364         | 2495               | 431583         | 1824               | 356183         | 2886               | 719071         |
| 19                 | 5051               | 675010         | 5859               | 963021         | 4655               | 1156032        | 7183               | 1053792        |
| 20                 | 11633              | 1357976        | 11980              | 1900188        | 10368              | 1735912        | 14563              | 2857699        |
| 21                 | 25371              | 3264089        | 26197              | 5701204        | 25629              | 3535730        | 29153              | 4574815        |
| 22                 | 56589              | 8838799        | 58307              | 36954526       | 59408              | 17342211       | 61274              | 7150725        |
| 23                 | 86871              | 12380064       | 96281              | 16230111       | 104279             | 13876185       | 92238              | 11478801       |
| 24                 | 106758             | 15858803       | 107163             | 16789294       | 110550             | 13976614       | 88454              | 11132008       |
| 25                 | 163774             | 30329161       | 175201             | 30506478       | 167791             | 29308221       | 147129             | 25211794       |
| 26                 | 26878              | 2614952        | 25200              | 2604983        | 35012              | 3348772        | 23242              | 3312923        |
| 27                 | 4346               | 443878         | 5074               | 624806         | 6657               | 745239         | 3949               | 515546         |
| 28                 | 889                | 660733         | 956                | 169292         | 942                | 301863         | 785                | 100930         |
| 29                 | 261                | 47120          | 278                | 41476          | 240                | 28580          | 259                | 57779          |
| 30                 | 76                 | 28149          | 73                 | 4979           | 42                 | 21092          | 78                 | 8336           |
| 31                 | 28                 | 61337          | 27                 | 58959          | 10                 | 865            | 15                 | 517            |
| >31                | 32                 | 2428           | 4                  | 1159           | 0                  | 0              | 0                  | 0              |

## Supplementary Note

### *Differential transcription during larval development*

Following ingestion of *T. suis* eggs by the host, the L1 stage undergoes histotropic development in the mucosa of the large intestine<sup>3,6</sup>. From L1 to L3 stage, the parasite grows substantially and must withstand the host's early immune response. At the L3 stage, the posterior end begins to protrude from the mucosa. As the nematode grows and develops to the L4, it increases significantly in size and begins sexual differentiation. Exploring the mRNA transcription of *T. suis* during the invasion and establishment phases in its host is central to understanding the biology of the parasite and the host-parasite interaction, underpinning new drugs and control strategies, and yielding new insights into how *T. suis* might suppress autoimmune disorders. To this end, we characterised the transcriptome of larval *T. suis*, investigating key genetic changes associated with the development of L1/L2s and the transition to L3 and L4 stages (**Supplementary Table 18**).

In the transition from L1/L2 to L3, *T. suis* undertakes a significant shift in its transcriptional activity, with 2,195 (representing 1,544 genes) and 2,507 (representing 1,607 genes) transcripts significantly enriched in these stages, respectively. Switching among alternatively-spliced transcripts accounts for ~20% of these differences, representing 503 L1/L2- and 529 L3-enriched transcripts (relating to 373 genes), respectively (**Supplementary Table 18**). From a metabolic perspective, L1/L2 *T. suis* have enriched transcription associated with the pentose phosphate pathway. There is also significant transcription linked to the reductive citrate cycle; however, compared with L3, the major transcriptional changes associated with this pathway relate to splice-isoform switching. Nonetheless, these findings suggest that the early metabolic activities of larval *T. suis* emphasize anabolism rather than energy production. At the L1/L2 stages, there is a disproportionate enrichment among transporters and channel proteins for porins, including 22 transcripts with homology to TT47<sup>7</sup>. Also enriched are porters, including various ionic, small molecule- and glucose transporters, and 15 RND superfamily transporters, including homologs of Niemann-Pick C1 and C1-like proteins and several homologues of the PATCH hedgehog receptor. Considering the immunoregulatory role that larval *T. suis* play during TSO (*Trichuris suis* ova) therapy of IBD<sup>8,9</sup> and other autoimmune disorders in humans<sup>10</sup>, an observed up-regulation specifically in the L1/L2 phase of lactosylceramide biosynthesis is of significant interest. An intermediary molecule between ceramide and lactosylceramide is the sphingolipid  $\beta$ -glucosylceramide; studies in mouse models for IBD have shown that the intraperitoneal injection of  $\beta$ -glucosylceramide results in decreased inflammation and the stimulation of a Th2-mediated immune response<sup>11,12</sup>. Glycosylceramides have been identified previously in at least one species of *Trichuris* (from goats<sup>13</sup>) and although their potential as immunomodulators has not been explored for *T. suis*, such molecules have been shown to have important immunomodulatory roles for schistosomes<sup>14</sup> and *Ascaris*<sup>15</sup>. We have predicted also a variety of proteins (representing 44 genes) with homology to known helminth-derived immunomodulators (**Supplementary Table 16**). Nearly all (103) of the 116 transcripts predicted for these genes are transcribed during the L1/L2 stage; most abundantly transcribed are several homologues of *Strongyloides ratti sra-hsp-17*<sup>4</sup> and galectins with significant peptide homology to host-derived galectin-9 as well as a thioredoxin peroxidase, cystatin (nearest to *bmal-cpi-2*), two SCP/TAP and two calreticulin homologues, and several serpins. Relative to the L3 stage, 17 transcripts encoding proteins with putative immunomodulatory roles are statistically significantly enriched in L1/L2; these transcripts represent homologues of *sra-hsp-17*, various serpins and SCP/TAPS proteins, a galectin and a putative TGF- $\beta$  mimic.

The transition to the L3 stage sees an increase in transcription associated with metabolic activity, particularly fatty acid, ceramide/sphingosine, and some components of glycan (i.e. 'mannose' and 'complex' N-glycan) biosynthesis, and of purine/pyrimidine (conversion of IMP to adenine/guanine ribonucleotides) or cysteine/methionine (biosynthesis and degradation) metabolism. The transcription of porin proteins appears to increase in richness during the transition from L1/L2 to L3, with 57 transcripts encoding these proteins up-regulated (p-value < 0.05). Also chymotrypsin-like serine proteases are prominently represented among transcripts with most enriched in L3s relative to L1/L2. This latter finding might suggest a significant shift and/or up-regulation in the digestion of host protein polymers as the worm matures. Notably, in acute *T. muris* infection in mice, host-derived serpins secreted into the intestinal mucosa, which are proposed to block the degradation of the mucus barrier by preventing the depolymerization of Muc2 by parasite secreted serine

proteases, peak between 14 and 21 days after infection<sup>16</sup>, coinciding with the development of the L3 stage of this nematode. Although the effect of *T. suis* on the host intestinal mucus barrier has not been explored, increased transcription of *Muc5a* in goblet cells is observed in pigs with this infection,<sup>16</sup> suggesting a similar degradation of the mucus barrier by chymotrypsin- or trypsin-like serine proteases. Also notable among the highly differentially transcribed sequences are several serpins, including an isoform of *Tsu\_03130*, which appears to encode *Ts*-CEI, a demonstrated inhibitor of cathepsin G and elastases of host neutrophils and, thus, a known immunomodulator of *T. suis*.<sup>17,18</sup>

The next major transition in the *T. suis* life-cycle is the moult from L3 to L4, which occurs ~3 to 4 weeks post-infection<sup>5,6</sup>. In the present RNA-seq study, this developmental transition coincided with 1,737 (1,247 genes) down- and 1,749 (1,221 genes) up-regulated transcripts. As observed in the change from L1/L2 to L3, many of the differentially transcribed sequences between L3 and L4 stages relate to isoform-switching (287 genes representing 384 and 392 transcripts, respectively). From a metabolic perspective, the major differences in the transition from L3 to L4 are an up-regulation of fatty acid biosynthesis (initiation and elongation) and an enrichment of  $\beta$ -oxidation. Also notable is a shift in glycosylation pathways, namely from N-linked ('mannose' and 'complex') to O-linked (i.e., glycosaminoglycan biosynthesis) glycans. Whether these changes are indicative of a shift in the glycan profile on the surface of the parasite is unknown, but, considering the potential role of helminth glycans (particularly O-linked) as immunostimulatory<sup>19</sup> and/or antigen-masking agents,<sup>20</sup> and the finding that N-linked (mannose) glycans play a key role in modulating antigen presentation in dendritic cells in *T. suis* infection<sup>2</sup>, this finding is worth additional investigation. Common among the genes under-going the greatest quantitative increases in transcription from L3 to L4 are a variety associated with oxidative stress (e.g., homologues of *C. elegans sod-1*, *pah-1* and *fah-1*). Their occurrence in the present dataset may be indicative of an increased immunological attack on the parasite by the host, reflected in a neutrophil oxidative burst, for example. This is consistent with immunohistological findings for *T. suis* infection of pigs,<sup>21</sup> which indicate that neutrophil activity peaks ~3-5 weeks post-innoculation (in the present study, L4s were harvested precisely 4 weeks p.i.). Notably, putative inhibitors of neutrophil cathepsin G/elastase<sup>17,18</sup>, including 3 splice-isoforms of *Tsu\_03130* ("*Ts*CEI"), are all among the genes showing the greatest enrichment in transcription in L4 compared with L3. Considering that L4 is the stage at which sexual dimorphism becomes apparent in dioecious nematodes, we note an up-regulation of various transcripts involved in vulval development/morphogenesis and/or expressed in vulval precursor cells (e.g., *acn-1*, *ced-10*, *C15B12.7b*, *eif-3*, *lin-1* and *-39*, *rab-9* and *rsp-9*), gonad development (e.g., *acin-1*, *baf-1*, *hda-1* and *mig-6* and *-17*), sex determination (e.g., *fox-1*, *sex-1*, *rsp-6* and *ufd-2*) and male gonadal/tail development (e.g., *adt-1*, *col-34*, *evl-20*, *lin-29*, *ptr-2* and *sur-2*) based on homology with *C. elegans*.

#### *Differential transcription associated with maturation to adulthood*

Following larval development, maturation to adulthood represents a major morphological and biological transformation in *T. suis*. To explore the early phases of sexual development and maturation, we compared transcription of L4s with adult male and female worms (**Supplementary Table 18**). This transition reflects the most substantial transcriptional changes observed here in the life cycle of *T. suis*. We identified 4,467 down- (2,789 genes) and 5,026 up-regulated (2,949 genes) transcripts between L4s and adult males, with 28% and 23% of these changes relating to isoform-switching for 776 genes between L4 and the adult male, respectively. Among all sequences differentially transcribed between L4 and the adult male, 3,837 (2,420 genes) and 3,736 (2,283 genes) are similarly down- and up-regulated, respectively, between L4 and male posterior body. Maturation to the adult male stage appears to coincide with increased energy production, with glycolysis, gluconeogenesis and the TCA cycle all being enriched, and a transition away from anabolism, with the pentose phosphate pathway continuing to be down-regulated. This increased energy production related mainly to glucose metabolism, with fatty-acid degradation being down-regulated compared with L4s. In contrast, fatty acid elongation and  $\beta$ -oxidation are enriched in male worms, with  $\beta$ -oxidation possibly supplying acetyl-CoA to the TCA cycle, allowing fatty acids to be used for energy production. In addition to these metabolic changes, 1,434 male-enriched transcripts with homology to 797 *C. elegans* genes are enriched in males relative to the L4 stage, with no

evidence for isoform-switching. Among the *C. elegans* homologues representing these differentially transcribed genes are a variety associated with sperm/spermatogenesis (e.g., *cbp-1*, *cpb-1*, *misp-3*, -33, -57, -63 and -79), male mating behaviour (e.g., *aex-3*, *arl-3*, *rab-3* and *sax-2*) and masculinization/male sex-determination (e.g., *fem-2* and Y54E10A.9c). Also notable among male-enriched sequences are 35 *C. elegans* homologues associated with development/maintenance and regulation of germline tissue, including *dbr-1*, *glp-1*, *rpt-3* and *spk-1*. By comparing L4s to the adult female, we identified 4,217 down- (linked to 2,629 genes) and 3,313 up-regulated (2,260 genes) transcripts associated with maturation; 3,795 (2,366 genes) and 1,984 (1,363 genes) of these transcripts are also down- and up-regulated, respectively, between L4 and the female posterior body. As observed in the comparison between L4s and the adult male, approximately one-quarter (22 and 25% for down- and up-regulated, respectively) of these differentially transcribed sequences are predicted to relate to isoform-switching among genes ( $n = 596$  genes). Among the female-enriched transcripts, 1,253 (958 genes) are also enriched in males relative to L4, and are likely associated with maturation to adulthood rather than sexual differentiation. Indeed, the vast majority (72.4%) of these male- and female-enriched sequences have an orthologue in the KEGG database, including genes associated with glycolysis, and some components of amino (methionine), fatty and nucleic acid metabolism. Among the 2,060 transcripts (1,448 genes) specifically up-regulated in the transition from L4 to the adult female, 1,158 (806 genes) were also up-regulated in the female posterior body and not in the adult male or male posterior body relative to L4. These female-enriched transcripts represented fatty acid and N- and O-linked glycan biosynthesis pathways, and homologues of 565 *C. elegans* genes. Among the *C. elegans* homologues are genes associated with egg-laying/oogenesis (e.g., *car-1*, *cbd-1*, *cej-1*, *emo-1*, *mau-2* and *spas-1*), embryogenesis (e.g., *ags-3*, *hnd-1*, *let-767*, *ptp-3*, *sym-5* and *unc-112*) and vulval development (*die-1*, *hda-1*, *let-341*, *met-1* and *tag-185*).

Of the transcripts down-regulated in the adult female relative to L4, 90% are also down-regulated in Fp. Indeed, there was a high level of consistency among the L4 sequences down-regulated during the maturation to adulthood, with 65% of the transcripts down-regulated in The adult female compared with L4, also down-regulated in the adult male, and 59% ( $n = 2,472$ ) down-regulated in The adult female, the female posterior body, the adult male and male posterior body. Among the 2,472 transcripts (1,600 genes) enriched in L4s relative to each adult library (The adult female, the female posterior body, the adult male and male posterior body), 521 (relating to 363 genes) related to isoform-switching. Of the remaining 1,951 transcripts (1,237 genes), only a relatively small proportion (representing 186 genes) have an orthologue in the KEGG database. Conspicuous among the KEGG pathways found to be down regulated during maturation is the synthesis of lactosylceramide, which appears to continually diminish as *T. suis* develops throughout the life-cycle. Among the transcripts shown to be most down-regulated in the adult stage/sexes are several porin homologues, 21 chymotrypsin-like serine proteases, one serpin (thought to be involved in inhibiting neutrophil secreted cathepsin G/elastases)<sup>17,18</sup>, and a CPI-2 cystatin homologue (thought to disrupt antigen presentation in dendritic cells). Also notable among the transcripts down-regulated with *T. suis* maturation are 79 *C. elegans* homologues, including some involved in larval development/morphogenesis and growth rate (e.g., *dao-5*, *daf-21*, *grl-25*, *ifb-1*, *mig-6*, *noah-2* and *nhr-95*).

#### *Differential transcription between adult sexes*

Sexual dimorphism in adult *T. suis* is of significant interest in relation to reproductive biology and potentially for the development of novel drug targets, considering the high likelihood that genes differentially transcribed between male and female worms are involved in critical reproductive processes and, thus, essential for the survival and transmission of this nematode<sup>22-24</sup>. By comparing the adult male and the adult female, we identified 3,411 female- (2,320 genes) and 5,189 male-enriched transcripts (3,153 genes). Considering reproductive processes, we explored differential transcription in the female posterior body compared with male posterior body, and identified 1,976 female- (1,340 genes) and 3,666 male-enriched transcripts (2,252 genes), respectively. As for other stages, isoform-switching was inferred to play a role in the differential transcription between adult females and males of *T. suis*, with 450 and 478 transcripts (representing 336 shared genes) relating to such switching events. Considering only the 1,004 genes (1,324 transcripts) enriched in the adult female and the female posterior body, and the 1,916 genes (2,477 transcripts) enriched in the adult

male and male posterior body, with no evidence of isoform-switching compared with the opposite gender, we identified 845 and 328 KEGG orthologues respectively, suggesting that many of the differences between the genders of adult *T. suis* relate to changes in activity of fundamental biological pathways, particularly in adult females. In females, these differences include an up-regulation of the reductive citrate cycle and fatty acid synthesis, suggesting an increased need for anabolic pathways. By contrast, male-enriched metabolic activity appears to relate to a conversion among metabolites, with an enrichment of sugar/starch and nucleic acid metabolism being most conspicuous. As would be expected, many of the differentially transcribed genes between male and female worms relate to sex-determination, gonadal development and gamete production. Among the genes encoding female-enriched transcripts are *C. elegans* homologues linked to vulval development/function (e.g., *ced-10*, C15B12.7, *die-1*, *nekl-2*, *rnp-4*, *sos-1*, *sqv-1*, *sqv-4* and *syg-2*), oogenesis (e.g., *cdk-1*, *cpb-1*, *cogc-2*, *ppk-1* and *unc-31*), ovulation (e.g., *ceh-18*, *lin-3*, *par-3* and *vab-1*), egg-laying (*asd-2*, *gbp-2*, *nhr-85*, *mau-2*, *sup-9*, *unc-2* and *unc-58*) and embryogenesis (e.g., *cht-1*, *hnd-1*, *let-767*, *uba-1*, *uba-2* and *xpo-1*). Of the genes encoding male-enriched transcripts are *C. elegans* homologues with functions including sperm/spermatogenesis (e.g., *alg-3*, *cbp-1*, *cogc-5*, and *msh-3*, -33, -57, 63, 78 and -79), masculinisation (e.g., Y54E10A.9c), male mating behaviour (e.g., *arl-3*, *crt-1*, *goa-1* and *lin-39*) and male development (e.g., *alg-3* and -4, *mab-5*, *dbl-1*, *lin-29* and *tag-170*).

#### *Putative gender-specific genes and their transcription*

The karyotyping of *Trichuris* spp. indicates members of this genus are XX (female) and XY (male)<sup>25</sup>, suggesting the potential that male-specific genes exist in *T. suis*. A surprising result in our comparative analyses of the male and female genome assemblies was that we could identify few examples of gender-specific genes in either assembly. In initial comparisons between the sexes, we have identified 14,115 and 14,240 female and male genes with an orthologue/paralogue in the opposite sex respectively (10,403 genes are defined as unambiguous one-to-one orthologues). Based on these comparisons we identified 281 and 341 genes 'specific' to the female and male assemblies respectively. Subsequent alignment of the gene sequences and their flanking regions using BLAT<sup>26</sup> identified 247 of the female 'specific' genes were present in the male assembly and simply absent from our male gene models. Of the remaining 34 genes predicted from the female assembly lacking a homologue in the male, just one is transcribed in a female and absent from all male RNA-seq libraries. Thus, as expected, we find no evidence for female-specific genes in *T. suis*. Only 75 of the male 'specific' genes were located in the female assembly and determined to absent only from the initial female gene models. Of the remaining 266 genes annotated in the male and unaccounted for in the female, just 41 are transcribed in a male, but absent from all female RNA-seq libraries, supporting their being sex-specific genes. Of these 41 male-specific sequences, only 3 have a homologue of known function in *C. elegans* [*frk-1* (a receptor tyrosine-kinase), *gpc-1* (a g-protein coupled receptor), *his-66* (a histone protein)]. As these latter sequences are hypothetical and scattered among numerous scaffolds, we do not speculate about their function or relation to the Y-chromosome. We found no evidence of the clustering of the male-specific genes among assembly scaffolds, which might provide evidence of the Y chromosome. Indeed a 4-way assessment (per Carvalho and Clark<sup>27</sup>) of the coverage of the male and female assembly using all male-derived or female-derived genomic reads revealed little evidence of sex-specific assembly scaffolds (data not shown), suggesting that much of the Y-chromosome of male *T. suis* may relate to repetitive sequence and few sex-specific genes. Noting this, we also can find no evidence of these male-specific genes or their flanking regions (up to 1,000 bp to the 5' or 3' of each gene) in the female assembly, suggesting these sequences are the best candidates we have for contigs contributing to the male chromosome in *T. suis*.

#### *Composition of 22A-RNA sequences and their 100-nt genomic neighborhoods*

We began our analysis of 22A-RNA genomic neighborhoods with 5,517 sequences from the male *T. suis* genome. For our purposes, we defined a genomic neighborhood (prior to such operations as merging overlapping neighborhood sequences) as a genomic site encoding a 22A-RNA itself, plus 100 nt of flanking DNA on that site's 5' and 3' ends. The 5,517 sequences fit this basic criterion (i.e., they did not come from 22A-RNA sites that were less than 100 nt from either end of a genomic scaffold). We then probed their possible nature by filtering out neighborhoods by various criteria: (1)



We chose to consider only those neighborhoods with complete determined DNA sequences (i.e., with no scaffolding 'N' residues). This criterion modestly reduced the number of sequences to 5,457. (2) We tested these 5,457 genomic neighborhoods for potential protein-coding or ncRNA sequences with BlastX<sup>28</sup> and INFERNAL<sup>29</sup>. This yielded 2,657 neighbourhoods with protein-coding potential, 171 with the potential to encode a familiar ncRNA (typically tRNA), and 470 with both potentials. (3) Removing these sequences left a set of 2,159 neighborhoods without such obvious traits. These 2,159 neighbourhoods, in many cases, overlapped one another on the genome. (4) To avoid having further analyses confused by spurious redundancy, we merged overlapping sequences, which yielded 671 spatially nonredundant 22A-RNA neighbourhood sequences. These 671 sequences still had redundancy at the DNA sequence level. When (5) merged further with CD-HIT-EST<sup>30</sup> at a threshold of 99% identity, they decreased to 646 sequences; at a threshold of 80% identity, they decreased to 563. Because 80% identity is still a quite conservative threshold for redundancy (requiring 178/222 nucleotide identities before merging two sequences), we used the latter threshold for further analysis. We (6) used BlastN of the 563 neighborhoods to test them for similarity to the 671 spatially nonredundant genomic neighborhoods in the male *T. suis* genome, to genomic DNA in other nematode species, and to uncharacterized ncRNAs in *C. elegans*. This showed that intragenomic similarities between neighborhoods were common: 42% (236/563) gave a (non-identical) BlastN hit to one or more sequences in the set of 671 genomic neighborhoods. Matches to other nematode genomes were much less common, but did occur in 3.9% (22/563) of cases. Still fewer (2.1%; 12/563) gave a match to a *C. elegans* ncRNA. (7) Examining 11 of the genomic neighborhoods that gave matches both to *C. elegans* ncRNAs and to non-*T. suis* genomic DNA, we found that all of them identified ncRNAs with cryptic, previously undescribed similarities to tRNAs (which we detected by searching the ncRNAs with INFERNAL).

We concluded, from all of the above data, that the 22A-RNAs of *T. suis* may be nucleolytic products of larger RNAs, and that these larger RNAs might be heterogeneous: some could be current/remnant mRNAs (annotated or unannotated in our current genomic analysis), others could be familiar ncRNAs (likewise, either annotated or unannotated), and yet others might identify unfamiliar ncRNAs in *T. suis* that we have not yet sufficiently characterized to define.

Even if 22A-RNAs arose from diverse sources, they might have common signals in their mature sequences that were responsible for their being generated. To detect such possible signals, we searched a nonredundant collection of 1,174 22A-RNA sequences with MEME for recurrent, statistically significant motifs. This non-redundant set came from 2,159 22A-RNAs embedded in the 2,159 neighbourhoods that lacked obvious protein-coding or ncRNA characteristics. We extracted 22A-RNA sequences from these 2,159 neighbourhoods, and merged those 22A-RNAs that overlapped spatially in the *T. suis* genome to yield a set of 1,344 22A-RNAs; we then merged them again with CD-HIT-EST to a threshold of 80% identity, to generate a final set of 1,174 22A-RNAs. The possible size of motifs was allowed to range from 6 to 22 nt (6 nt being the smallest motif we felt likely to be informative, and 22 nt being the full size of a mature 22A-RNA). We found one significant 8-nt motif (E-value =  $1.6 \cdot 10^{-40}$ ; **Supplementary Figure 11**). The motif's consensus sequence was 5'-A[CA]GATAT[GT]-3', and its highest-scoring individual sequence was 5'-ACGATATG-3'. Among 5,457 original, unmerged 22A-RNA sequences, this motif occurred at a frequency of 4.5% (in 245 sequences) with a significance of  $p \leq 10^{-3}$ . This distribution was not entirely random: among 2,159 unmerged 22A-RNAs whose neighborhoods lacked obvious protein or ncRNA similarities (from which whose 22A-RNA sequences we had generated the 8-nt motif), there were 180 sequences containing the 8-nt motif (8.3%, roughly twice the overall average), whereas among 3,298 nonmerged 22A-RNAs whose neighborhoods did exhibit associated protein or ncRNA similarities (and whose 22A-RNA sequences had not been used to generate the 8-nt motif), there were only 65 unmerged sequences containing the 8-nt motif (2.0%, less than half the overall average).

## References

- 1 Hewitson JP, Grainger JR & Maizels RM. Helminth immunoregulation: the role of parasite secreted proteins in modulating host immunity. *Mol. Biochem. Parasitol.* **167**, 1-11 (2009).
- 2 Klaver EJ, Kuijk LM, Laan LC *et al.* *Trichuris suis*-induced modulation of human dendritic cell function is glycan-mediated. *Int. J. Parasitol.* **43**, 191-200 (2013).
- 3 McSorley HJ, Hewitson JP & Maizels RM. Immunomodulation by helminth parasites: Defining mechanisms and mediators. *Int. J. Parasitol.* **43**, 301-310 (2013).
- 4 McSorley HJ & Maizels RM. Helminth infections and host immune regulation. *Clin. Microbiol. Rev.* **25**, 585-608 (2012).
- 5 Beer RJ. Morphological descriptions of the egg and larval stages of *Trichuris suis* Schrank, 1788. *Parasitology* **67**, 263-278 (1973).
- 6 Beer RJ. Studies on the biology of the life-cycle of *Trichuris suis* Schrank, 1788. *Parasitology* **67**, 253-262 (1973).
- 7 Drake L, Korchev Y, Bashford L *et al.* The major secreted product of the whipworm, *Trichuris*, is a pore-forming protein. *Proc. Biol. Sci.* **257**, 255-261 (1994).
- 8 Summers RW, Elliott DE, Urban JF, Jr., Thompson RA & Weinstock JV. *Trichuris suis* therapy for active ulcerative colitis: a randomized controlled trial. *Gastroenterology* **128**, 825-832 (2005).
- 9 Summers RW, Elliott DE, Qadir K *et al.* *Trichuris suis* seems to be safe and possibly effective in the treatment of inflammatory bowel disease. *Am. J. Gastroenterol.* **98**, 2034-2041 (2003).
- 10 Fleming JO, Isaak A, Lee JE *et al.* Probiotic helminth administration in relapsing-remitting multiple sclerosis: a phase 1 study. *Mult. Scler.* **17**, 743-754 (2011).
- 11 Zigmond E, Preston S, Pappo O *et al.* Beta-glucosylceramide: a novel method for enhancement of natural killer T lymphocyte plasticity in murine models of immune-mediated disorders. *Gut* **56**, 82-89 (2007).
- 12 Lalazar G, Preston S, Zigmond E, Ben Yaacov A & Ilan Y. Glycolipids as immune modulatory tools. *Mini. Rev. Med. Chem.* **6**, 1249-1253 (2006).
- 13 Sarwal R, Sanyal SN & Khera S. Lipid metabolism in *Trichuris globulosa* (Nematoda). *J. Helminthol.* **63**, 287-297 (1989).
- 14 Nagayama Y, Watanabe K, Niwa M, McLachlan SM & Rapoport B. *Schistosoma mansoni* and alpha-galactosylceramide: prophylactic effect of Th1 Immune suppression in a mouse model of Graves' hyperthyroidism. *J. Immunol.* **173**, 2167-2173 (2004).
- 15 Deehan MR, Goodridge HS, Blair D *et al.* Immunomodulatory properties of *Ascaris suum* glycosphingolipids - phosphorylcholine and non-phosphorylcholine-dependent effects. *Parasite Immunol.* **24**, 463-469 (2002).
- 16 Hasnain SZ, McGuckin MA, Grecnis RK & Thornton DJ. Serine protease(s) secreted by the nematode *Trichuris muris* degrade the mucus barrier. *PLoS Negl. Trop. Dis.* **6**, e1856 (2012).
- 17 Rhoads ML, Fetterer RH, Hill DE & Urban JF, Jr. *Trichuris suis*: a secretory chymotrypsin/elastase inhibitor with potential as an immunomodulator. *Exp. Parasitol.* **95**, 36-44 (2000).
- 18 Rhoads ML, Fetterer RH & Hill DE. *Trichuris suis*: A secretory serine protease inhibitor. *Exp. Parasitol.* **94**, 1-7 (2000).
- 19 Johnston MJ, MacDonald JA & McKay DM. Parasitic helminths: a pharmacopeia of anti-inflammatory molecules. *Parasitology* **136**, 125-147 (2009).
- 20 van Die I & Cummings RD. Glycan gimmickry by parasitic helminths: a strategy for modulating the host immune response? *Glycobiology* **20**, 2-12 (2010).
- 21 Kringel H, Iburg T, Dawson H, Aasted B & Roepstorff A. A time course study of immunological responses in *Trichuris suis* infected pigs demonstrates induction of a local type 2 response associated with worm burden. *Int. J. Parasitol.* **36**, 915-924 (2006).
- 22 Nisbet AJ, Cottee PA & Gasser RB. Genomics of reproduction in nematodes: prospects for parasite intervention? *Trends Parasitol.* **24**, 89-95 (2008).
- 23 Nisbet AJ, Cottee P & Gasser RB. Molecular biology of reproduction and development in parasitic nematodes: progress and opportunities. *Int. J. Parasitol.* **34**, 125-138 (2004).

- 24 Boag PR, Gasser RB, Nisbet AJ & Newton SE. Genomics of reproduction in parasitic nematodes-fundamental and biotechnological implications. *Biotechnol. Adv.* **21**, 103-108 (2003).
- 25 Spakulova M, Kralova I & Cutillas C. Studies on the karyotype and gametogenesis in *Trichuris muris*. *J. Helminthol.* **68**, 67-72 (1994).
- 26 Kent WJ. BLAT--the BLAST-like alignment tool. *Genome Res.* **12**, 656-664 (2002).
- 27 Carvalho AB & Clark AG. Efficient identification of Y chromosome sequences in the human and *Drosophila* genomes. *Genome Res.* **23**, 1894-1907 (2013).
- 28 Altschul SF, Madden TL, Schaffer AA *et al.* Gapped BLAST and PSI-BLAST: a new generation of protein database search programs. *Nucleic Acids Res.* **25**, 3389-3402 (1997).
- 29 Nawrocki EP & Eddy SR. Infernal 1.1: 100-fold faster RNA homology searches. *Bioinformatics* **29**, 2933-2935 (2013).
- 30 Fu L, Niu B, Zhu Z, Wu S & Li W. CD-HIT: accelerated for clustering the next-generation sequencing data. *Bioinformatics* **28**, 3150-3152 (2012).
